# Supplementary material for: Metabolites with Anti-Inflammatory Activity from the Mangrove Endophytic Fungus Diaporthe sp. QYM12
Source: MDPI journal article supplement (doi:10.3390/md19020056), 2021-01-24
Supplement: s1 [file s1]

# Metabolites with Anti-inflammatory Activity from the Mangrove Endophytic Fungus *Diaporthe* sp. QYM12

Yan Chen <sup>1,2</sup>, Ge Zou <sup>2</sup>, Wencong Yang <sup>2</sup>, Yingying Zhao <sup>1</sup>, Qi Tan <sup>2</sup>, Lin Chen <sup>3</sup>, Jinmei Wang <sup>1</sup>, Changyang Ma <sup>1</sup>, Wenyi Kang <sup>1,\*</sup> and Zhigang She <sup>2,\*</sup>

<sup>1</sup> National R & D Center for Edible Fungus Processing Technology, Henan University, Kaifeng 475004, China; chenyan27@mail2.sysu.edu.cn (Y.C.); zhaoyingying@vip.henu.edu.cn (Y.Z.); wangjinmei@henu.edu.cn (J.W.); macaya1024@vip.henu.edu.cn (C.M.);

<sup>2</sup> School of Chemistry, Sun Yat-Sen University, Guangzhou 510275, China; zoug5@mail2.sysu.edu.cn (G.Z.); yangwc6@mail2.sysu.edu.cn (W.Y.); tanq27@mail2.sysu.edu.cn (Q.T.);

<sup>3</sup> Henan Joint International Research Laboratory of Drug Discovery of Small Molecules, Zhengzhou Key Laboratory of Synthetic Biology of Natural Products, Huanghe Science and Technology College, Zhengzhou 450063, China; lchenchina@hhstu.edu.cn (L.C.)

\* Correspondence: kangwenyi@henu.edu.cn (W.K.); cesshzhg@mail.sysu.edu.cn (Z.S.)

## Supporting Information Contents:

**Figure. S1** <sup>1</sup>H NMR spectrum of compound **1** (500 MHz, CDCl<sub>3</sub>).

**Figure. S2** <sup>13</sup>C NMR spectrum of compound **1** (125 MHz, CDCl<sub>3</sub>).

**Figure. S3** HSQC spectrum of compound **1**.

**Figure. S4** <sup>1</sup>H-<sup>1</sup>H COSY spectrum of compound **1**.

**Figure. S5** HMBC spectrum of compound **1**.

**Figure. S6** HRESIMS spectrum of compound **1**.

**Figure. S7** NOESY spectrum of compound **1**.

**Figure. S8** <sup>1</sup>H NMR spectrum of compound **2** (500 MHz, CDCl<sub>3</sub>).

**Figure. S9** <sup>13</sup>C NMR spectrum of compound **2** (125 MHz, CDCl<sub>3</sub>).

**Figure. S10** HSQC spectrum of compound **2**.

**Figure. S11** <sup>1</sup>H-<sup>1</sup>H COSY spectrum of compound **2**.

**Figure. S12** HMBC spectrum of compound **2**.

**Figure. S13** NOESY spectrum of compound **2**.

**Figure. S14** HRESIMS spectrum of compound **2**.

**Figure. S15**  $^1\text{H}$  NMR spectrum of compound **3** (500 MHz,  $\text{MeOH-}d_4$ ).

**Figure. S16**  $^{13}\text{C}$  NMR spectrum of compound **3** (125 MHz,  $\text{MeOH-}d_4$ ).

**Figure. S17** HSQC spectrum of compound **3**.

**Figure. S18**  $^1\text{H-}^1\text{H}$  COSY spectrum of compound **3**.

**Figure. S19** HMBC spectrum of compound **3**.

**Figure. S20** NOESY spectrum of compound **3**.

**Figure. S21** HRESIMS spectrum of compound **3**.

**Figure. S22**  $^1\text{H}$  NMR spectrum of compound **4** (500 MHz,  $\text{MeOH-}d_4$ ).

**Figure. S23**  $^{13}\text{C}$  NMR spectrum of compound **4** (125 MHz,  $\text{MeOH-}d_4$ ).

**Figure. S24** HSQC spectrum of compound **4**.

**Figure. S25**  $^1\text{H-}^1\text{H}$  COSY spectrum of compound **4**.

**Figure. S26** HMBC spectrum of compound **4**.

**Figure. S27** HRESIMS spectrum of compound **4**.

**Figure. S28**  $^1\text{H}$  NMR spectrum of compound **5** (500 MHz,  $\text{CDCl}_3$ ).

**Figure. S29**  $^{13}\text{C}$  NMR spectrum of compound **5** (125 MHz,  $\text{CDCl}_3$ ).

**Figure. S30** HSQC spectrum of compound **5**.

**Figure. S31**  $^1\text{H-}^1\text{H}$  COSY spectrum of compound **5**.

**Figure. S32** HMBC spectrum of compound **5**.

**Figure. S33** HRESIMS spectrum of compound **5**.

**Figure. S34**  $^1\text{H}$  NMR spectrum of compound **6** (500 MHz,  $\text{CDCl}_3$ ).

**Figure. S35**  $^{13}\text{C}$  NMR spectrum of compound **6** (125 MHz,  $\text{CDCl}_3$ ).

**Figure. S36** HSQC spectrum of compound **6**.

**Figure. S37**  $^1\text{H}$ - $^1\text{H}$  COSY spectrum of compound **6**.

**Figure. S38** HMBC spectrum of compound **6**.

**Figure. S39** HRESIMS spectrum of compound **6**.

1. The method of anti-inflammatory assay.

**Table S1.** Inhibitory activities against LPS-Induced NO Production of **1-7** at 50  $\mu\text{M}$ .

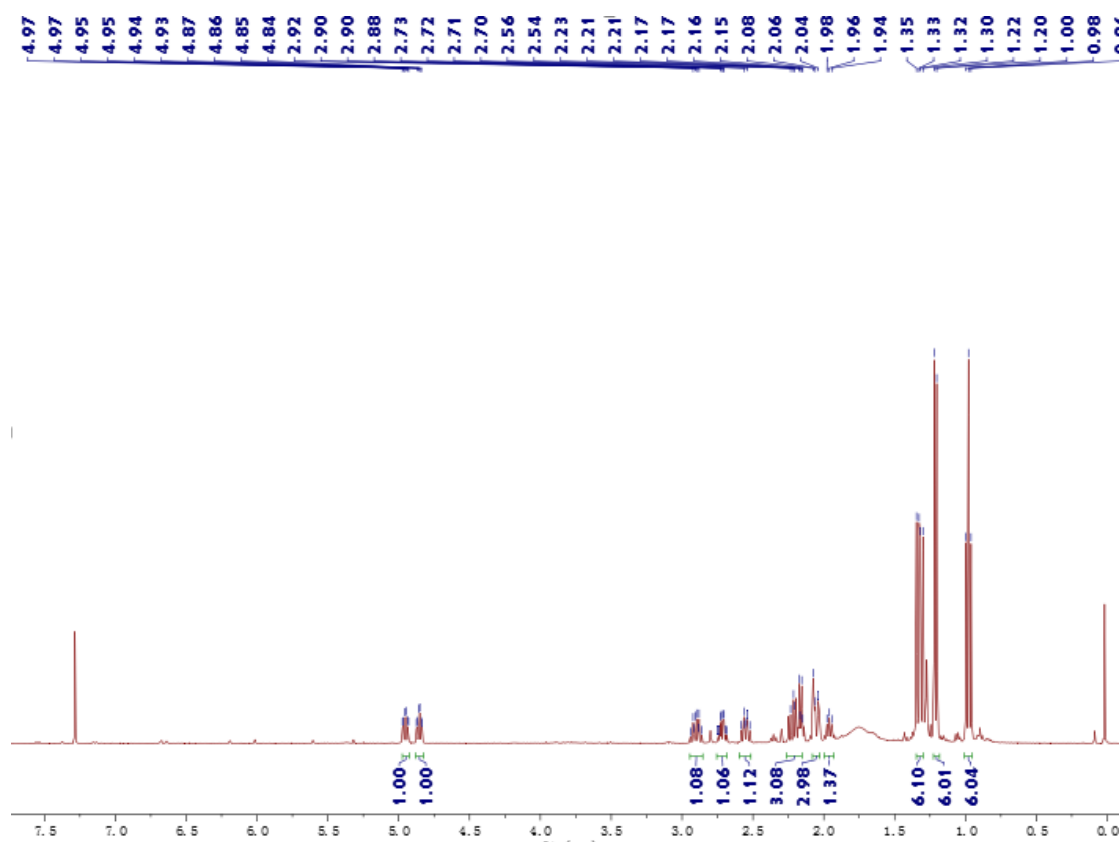

**Figure. S1**  $^1\text{H}$  NMR spectrum of compound **1** (500 MHz,  $\text{CDCl}_3$ ).

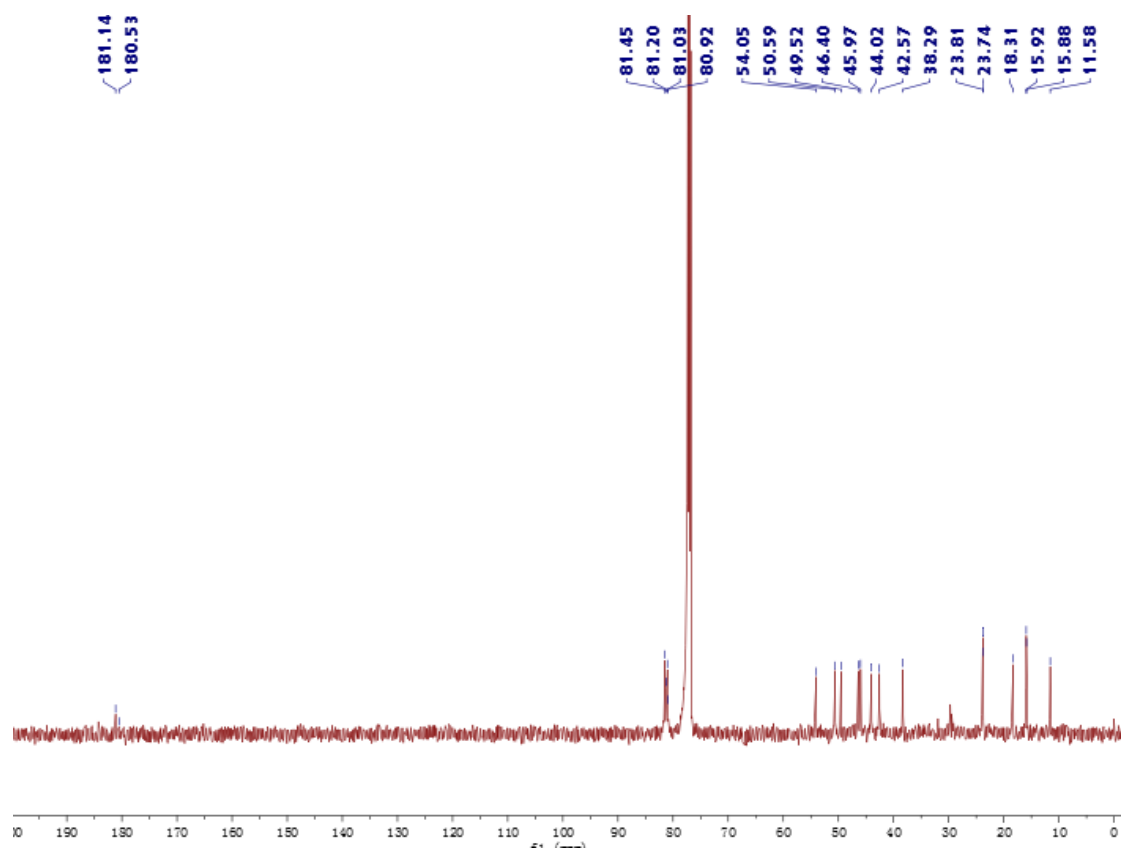

**Figure. S2**  $^{13}\text{C}$  NMR spectrum of compound **1** (125 MHz,  $\text{CDCl}_3$ ).

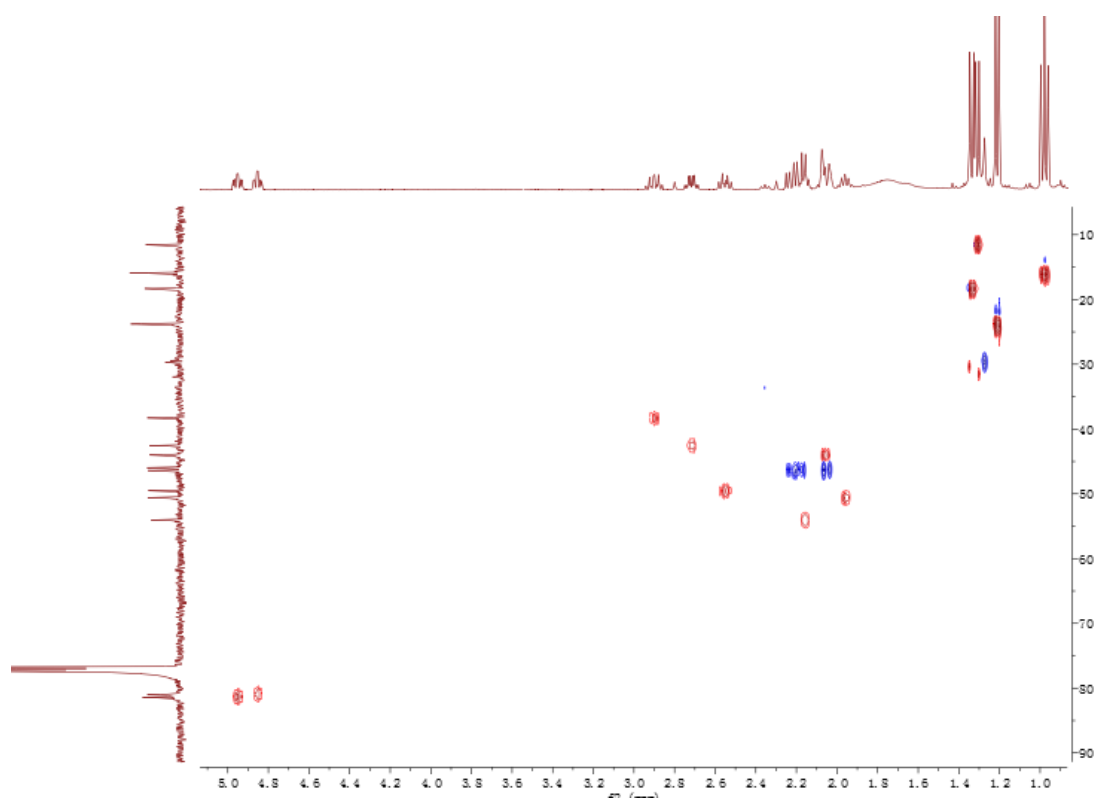

**Figure. S3** HSQC spectrum of compound **1**.

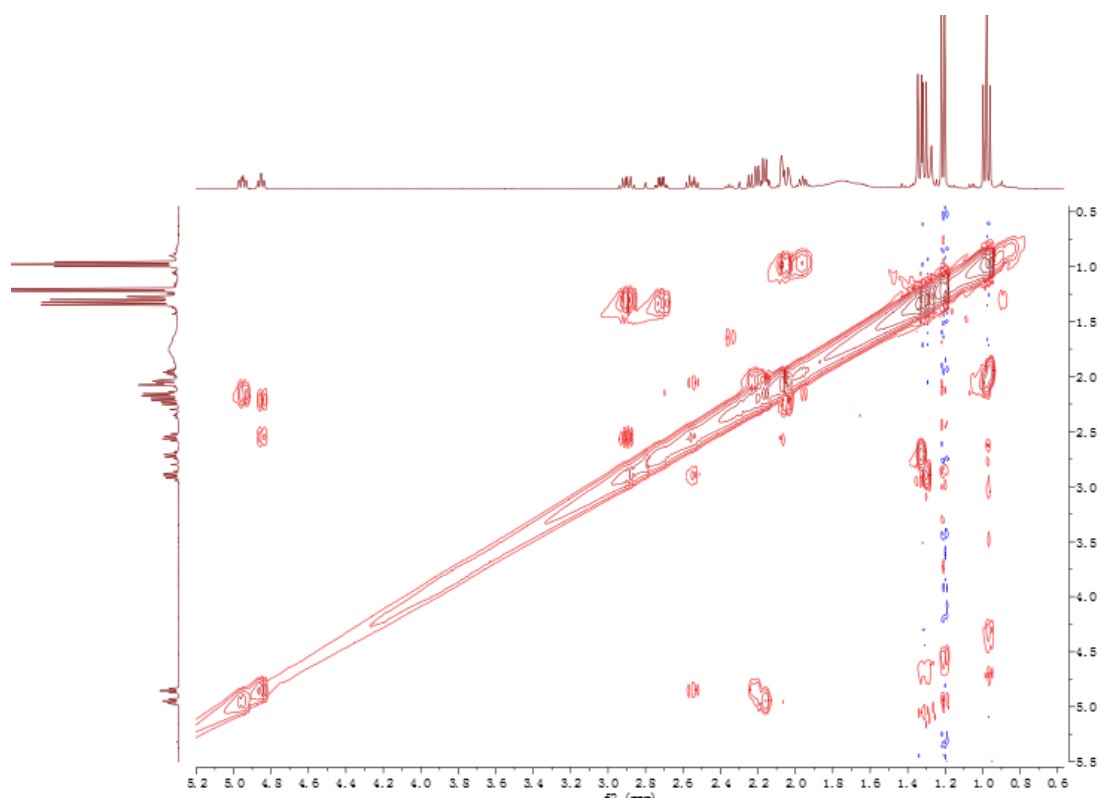

**Figure. S4**  $^1\text{H}$ - $^1\text{H}$  COSY spectrum of compound **1**.

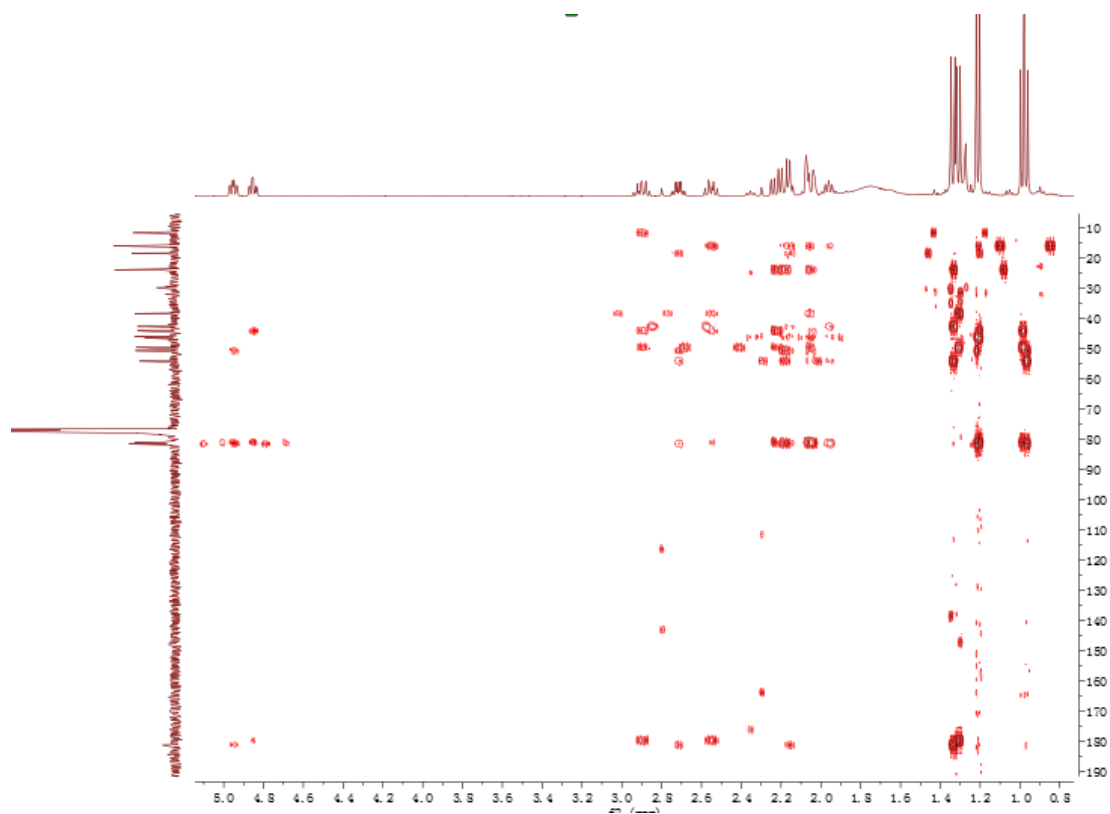

**Figure. S5** HMBC spectrum of compound **1**.

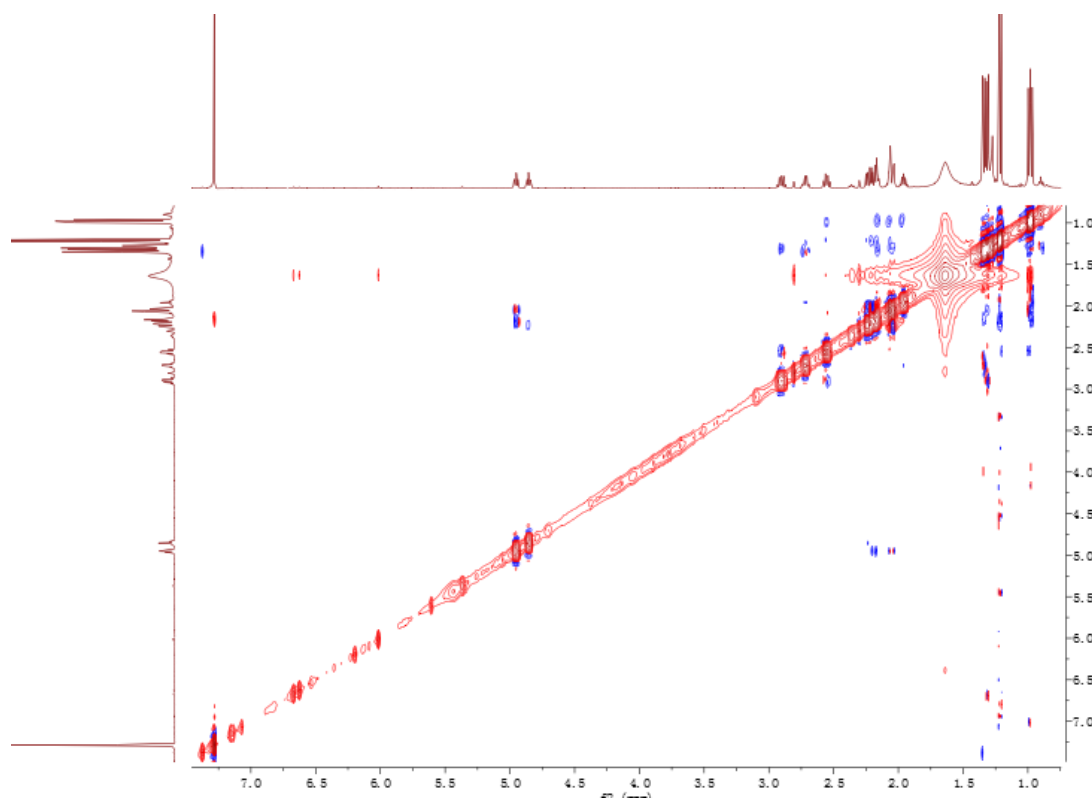

**Figure. S6** NOESY spectrum of compound **1**.

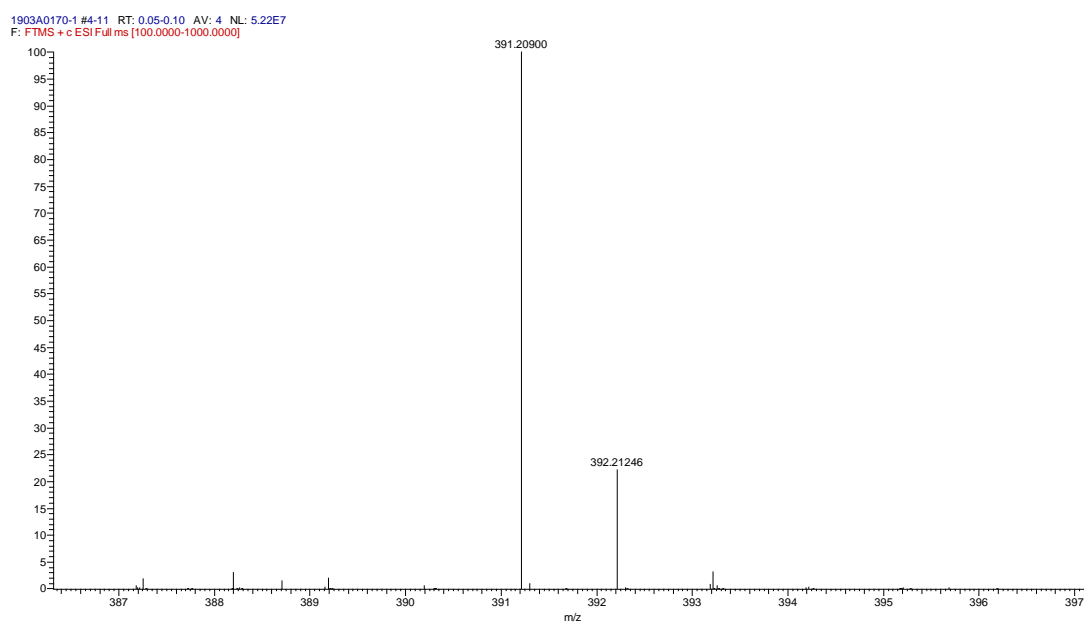

**Figure. S7** HRESIMS spectrum of compound **1**.

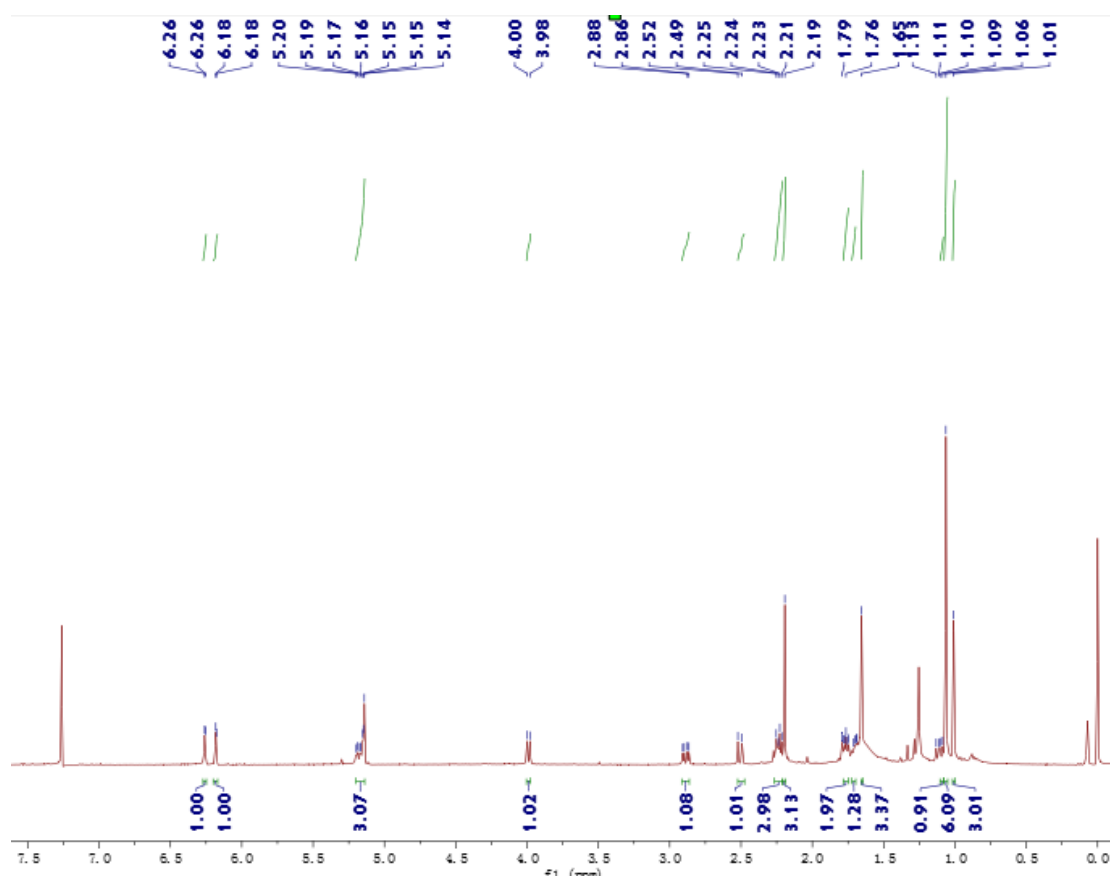

Figure. S8 <sup>1</sup>H NMR spectrum of compound 2 (500 MHz, CDCl<sub>3</sub>).

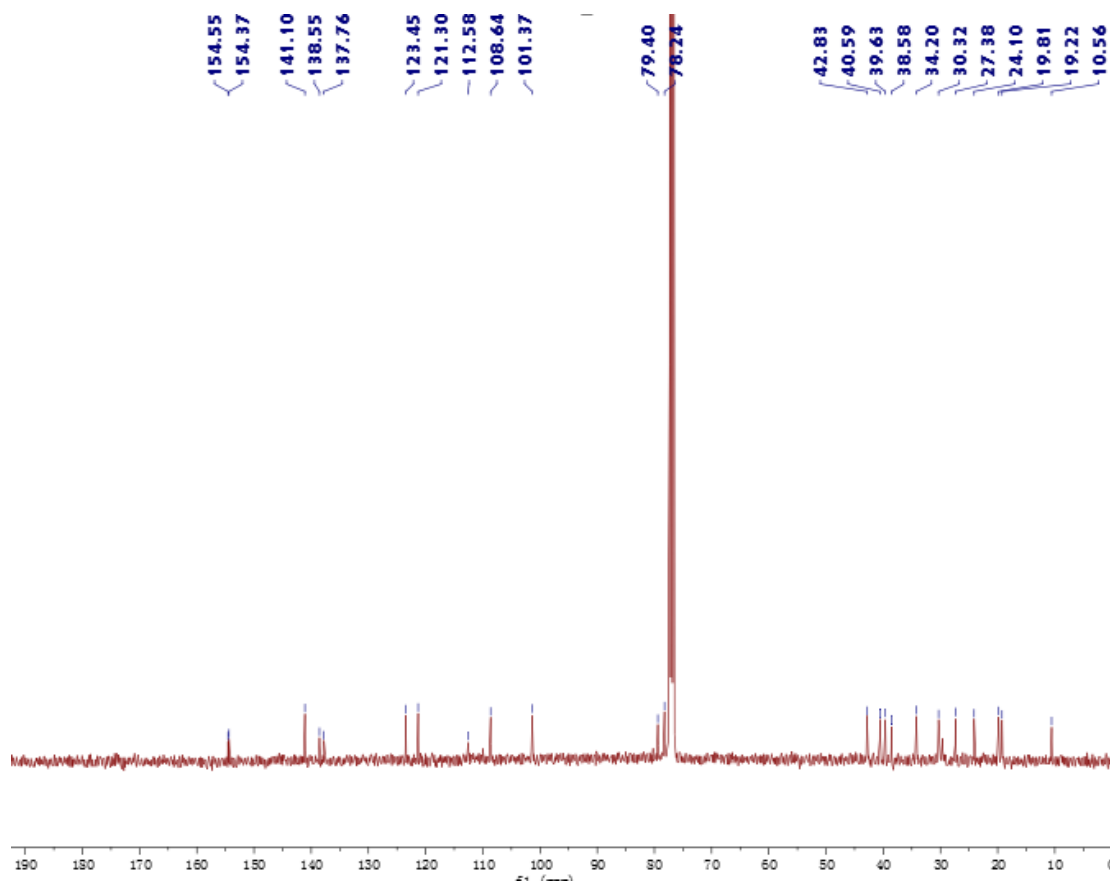

**Figure. S9**  $^{13}\text{C}$  NMR spectrum of compound **2** (125 MHz,  $\text{CDCl}_3$ ).

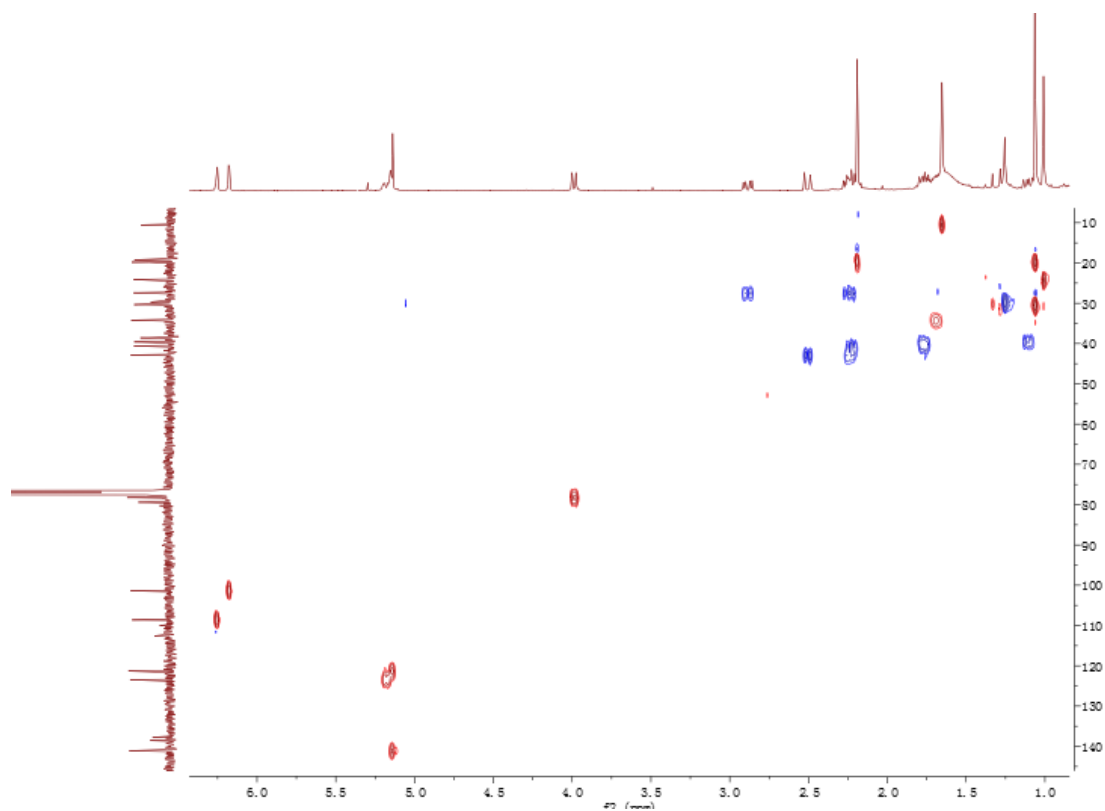

**Figure. S10** HSQC spectrum of compound **2**.

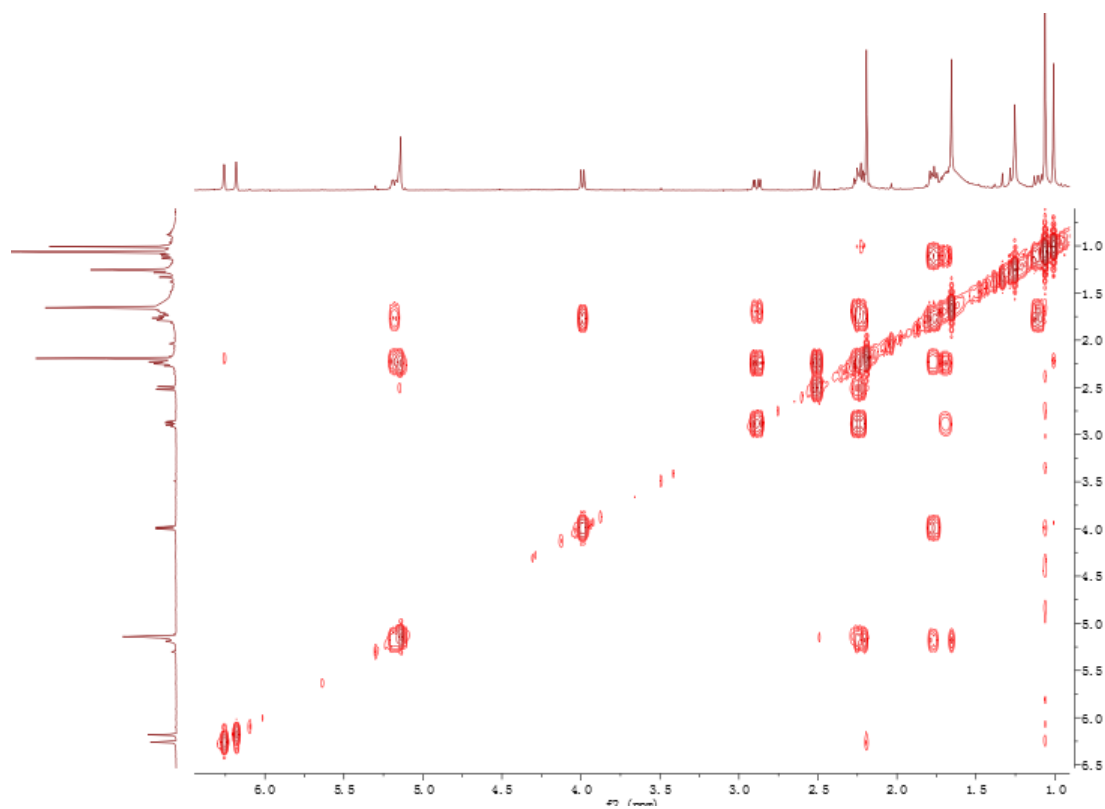



**Figure. S11**  $^1\text{H}$ - $^1\text{H}$  COSY spectrum of compound **2**.

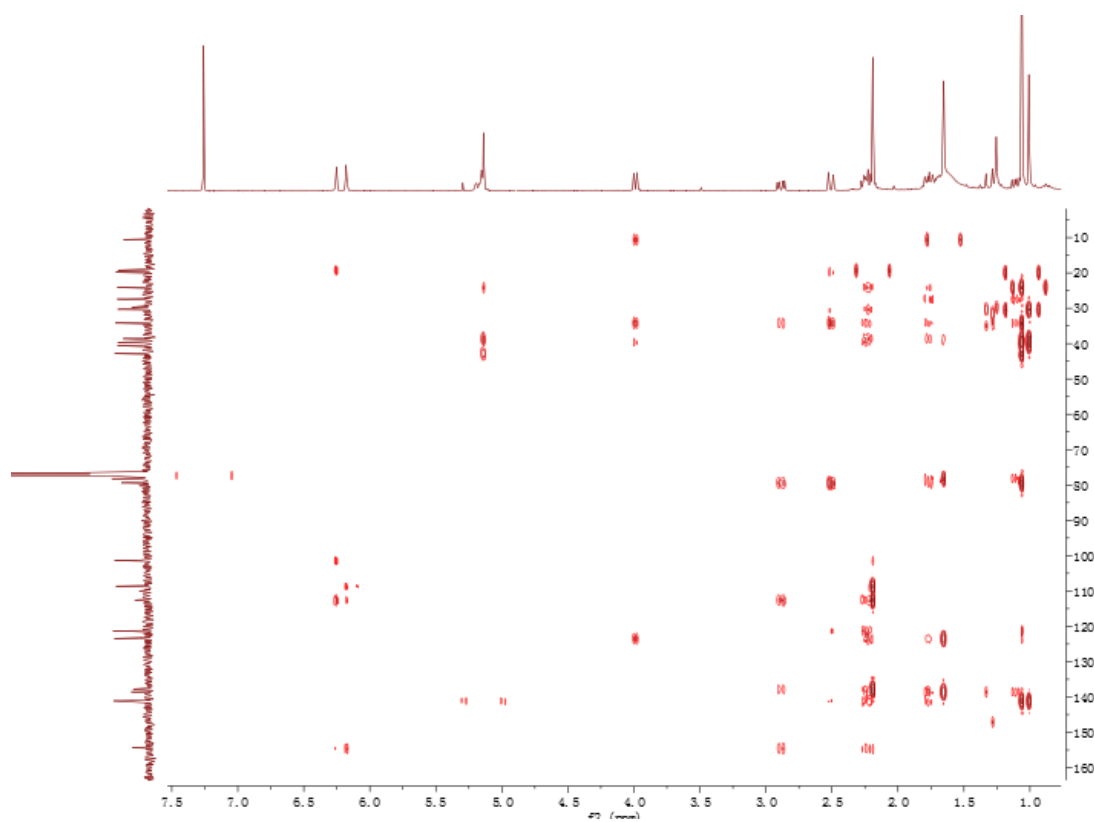

**Figure. S12** HMBC spectrum of compound **2**.

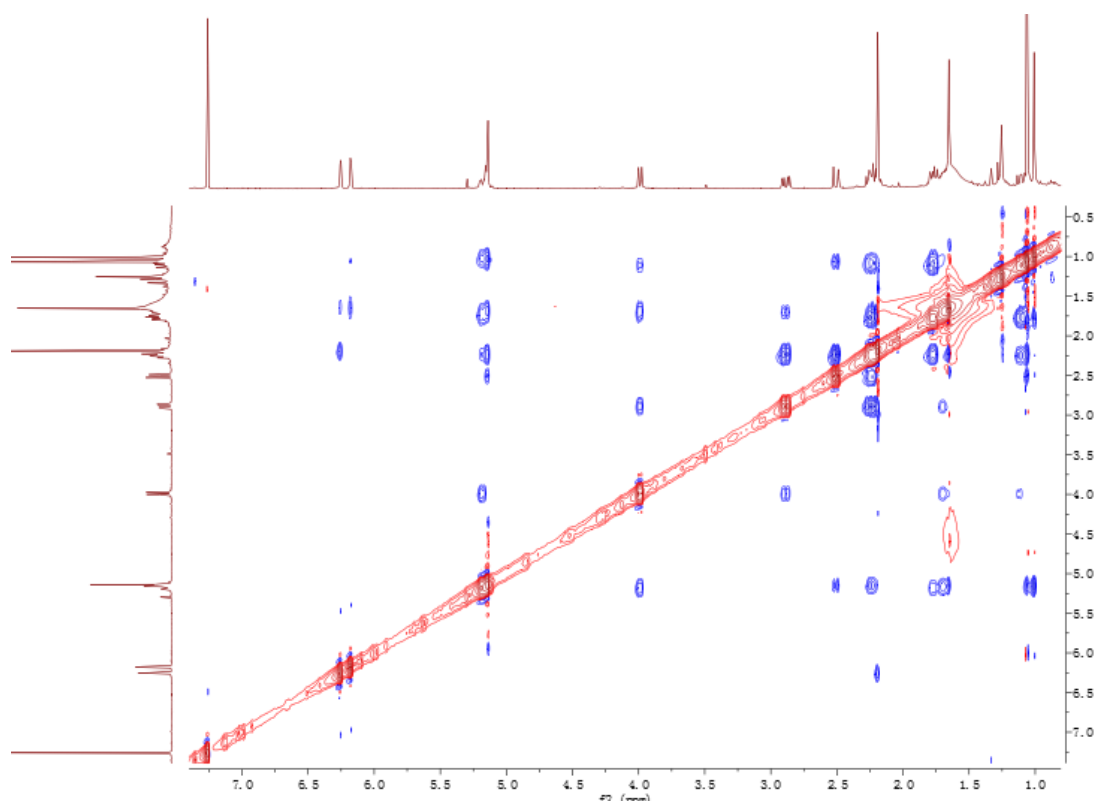

**Figure. S13** NOESY spectrum of compound **2**.

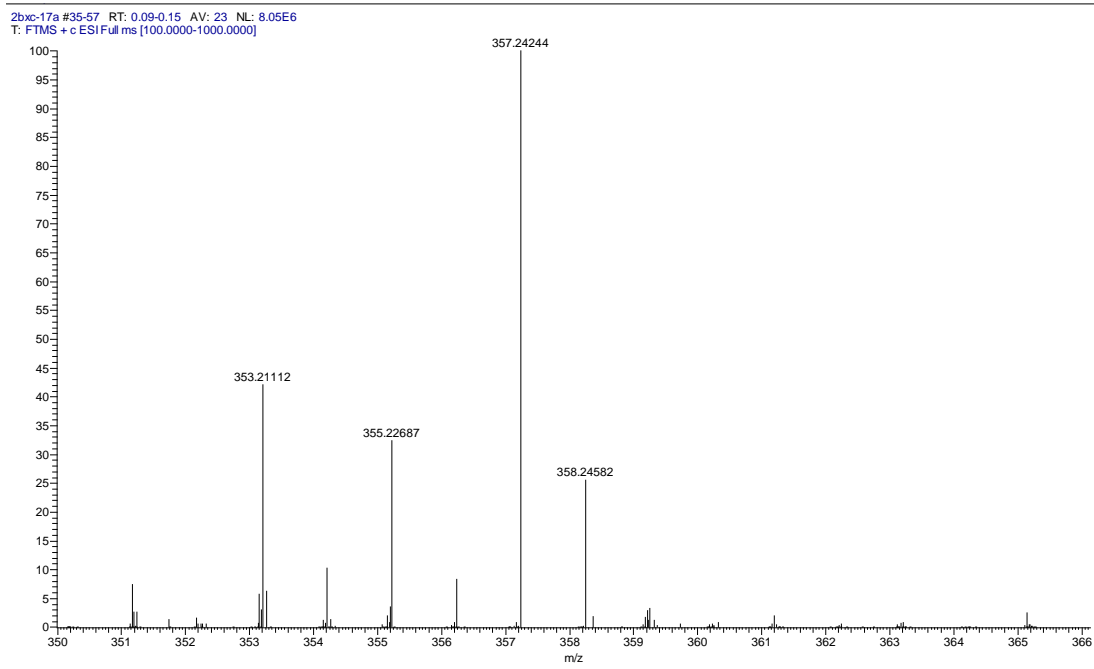

**Figure. S14** HRESIMS spectrum of compound **2**.

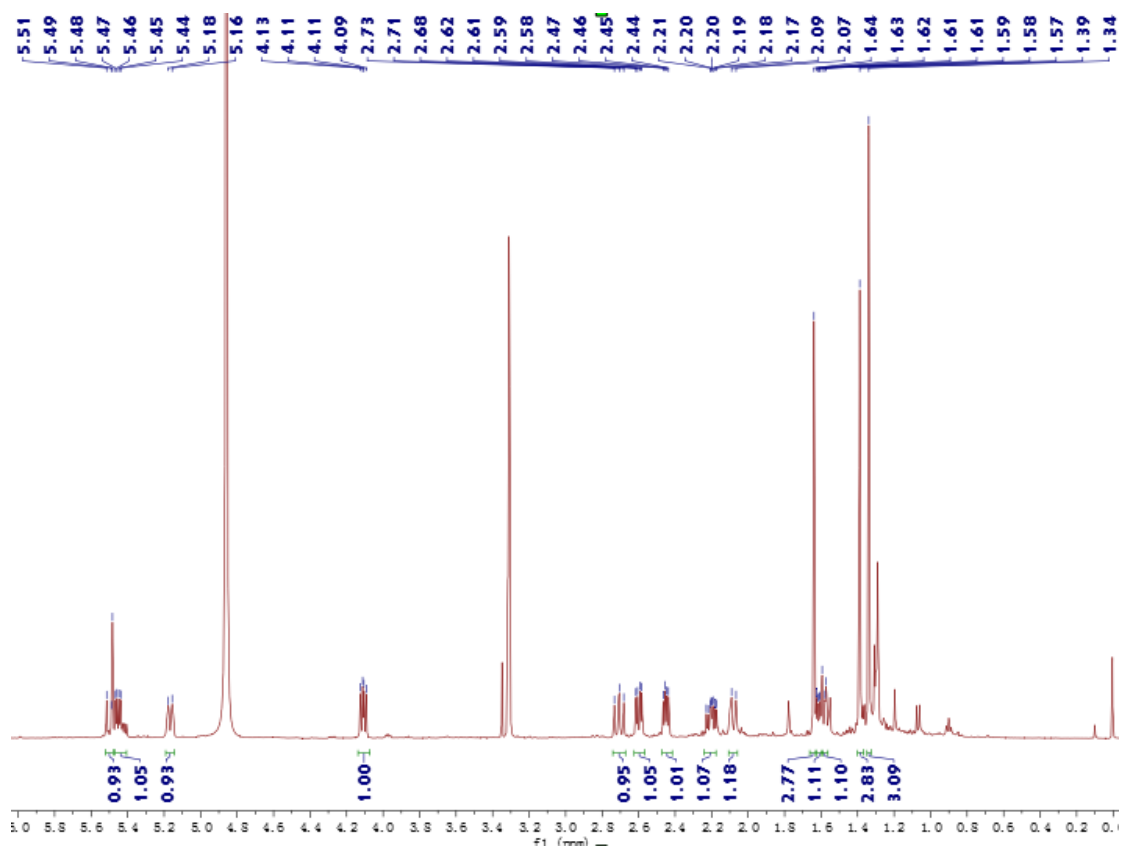

**Figure. S15** <sup>1</sup>H NMR spectrum of compound **3** (500 MHz, MeOH-*d*<sub>4</sub>).

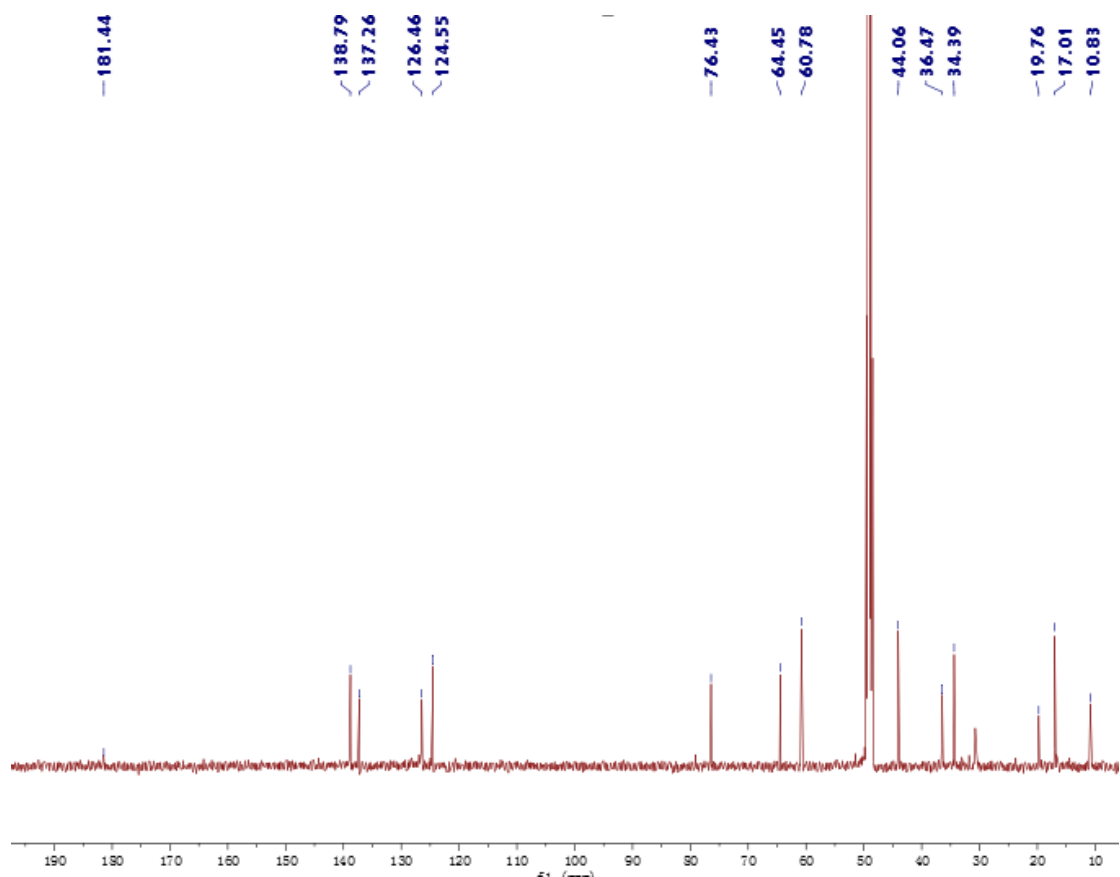

**Figure. S16**  $^{13}\text{C}$  NMR spectrum of compound **3** (125 MHz,  $\text{MeOH-}d_4$ ).

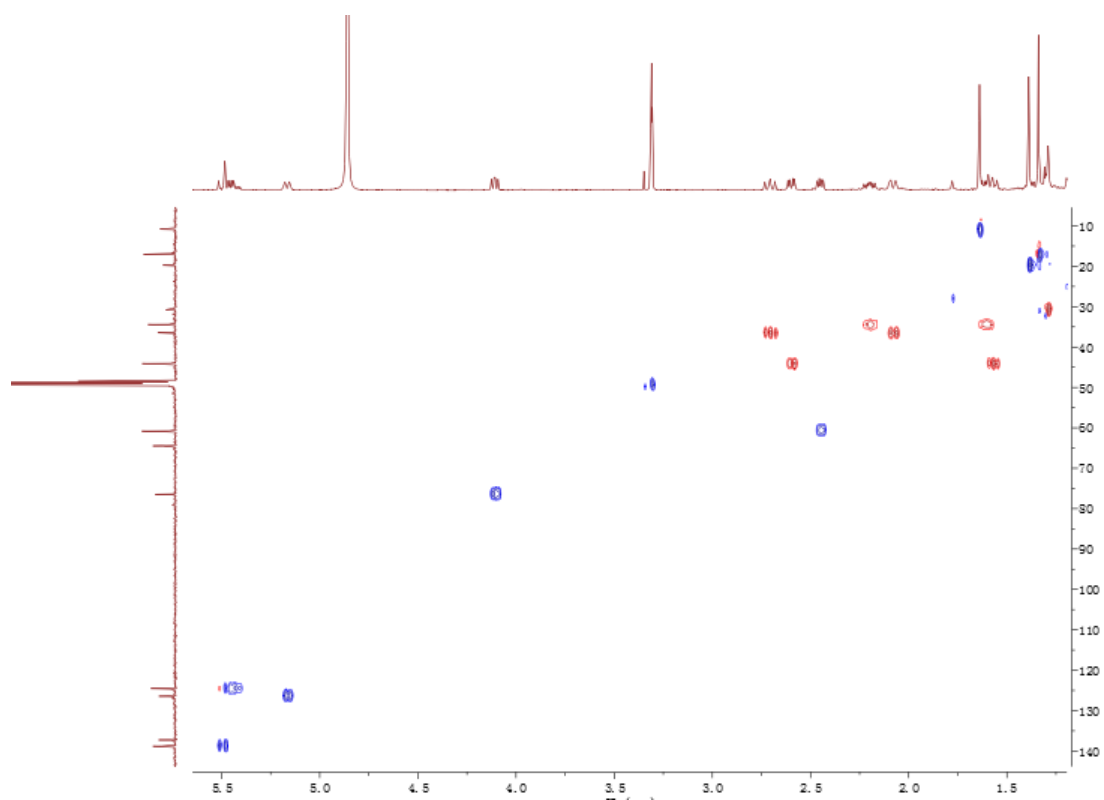

**Figure. S17** HSQC spectrum of compound **3**.

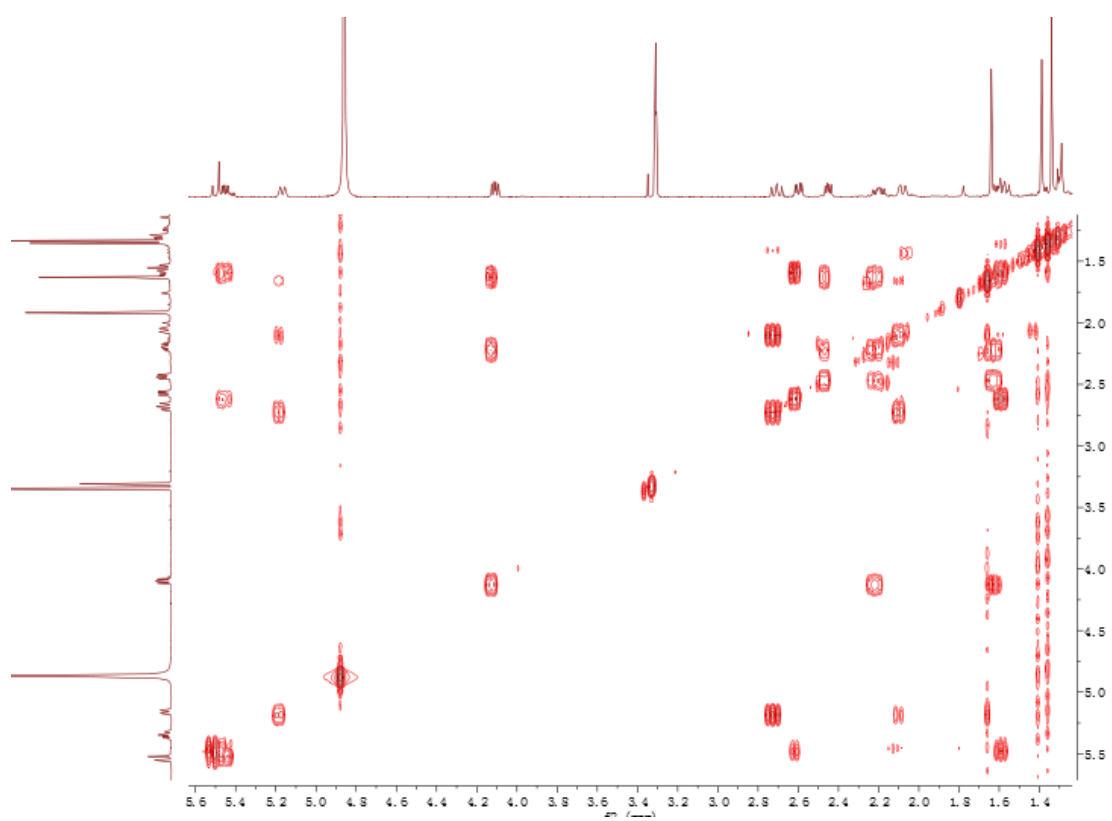

**Figure. S18**  $^1\text{H}$ - $^1\text{H}$  COSY spectrum of compound **3**.

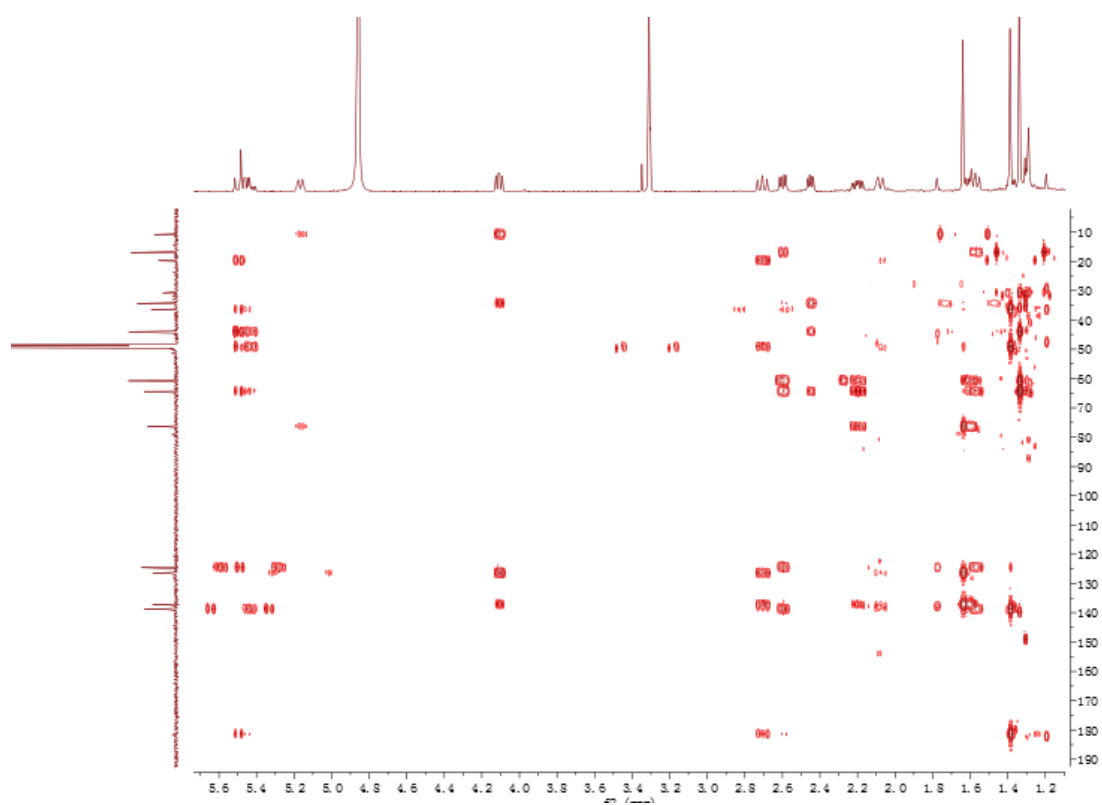

**Figure. S19** HMBC spectrum of compound **3**.

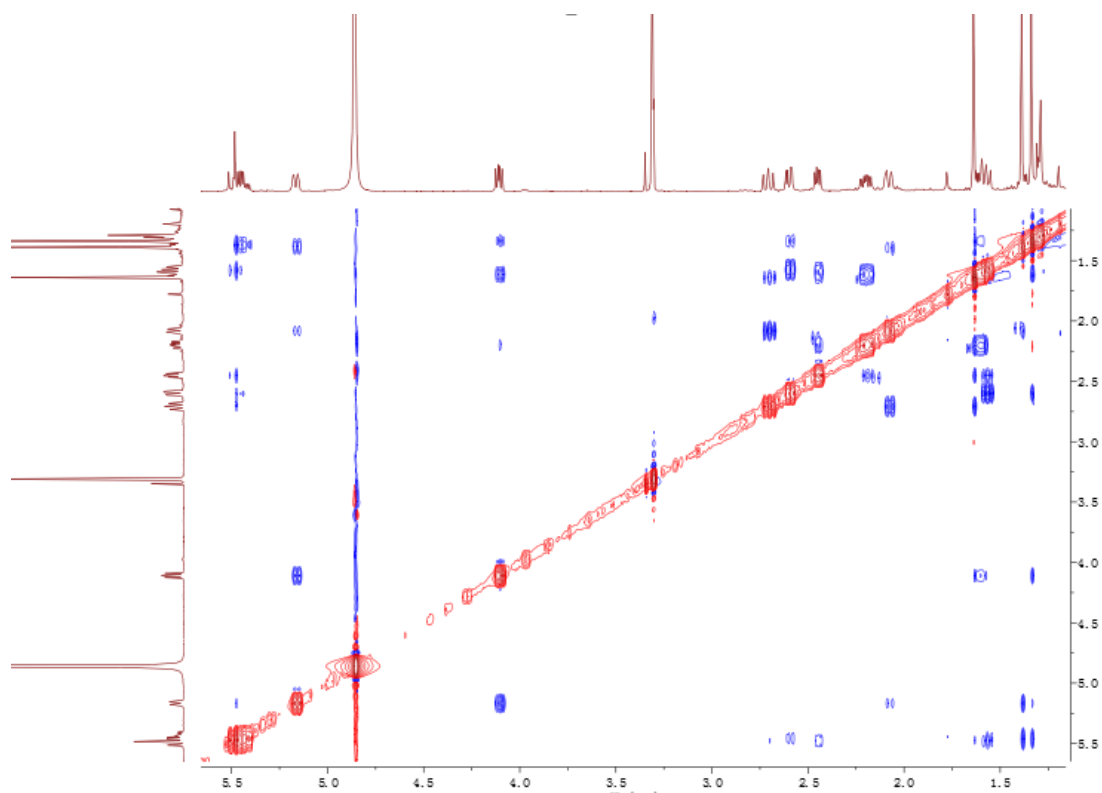

**Figure. S20** NOESY spectrum of compound 3.

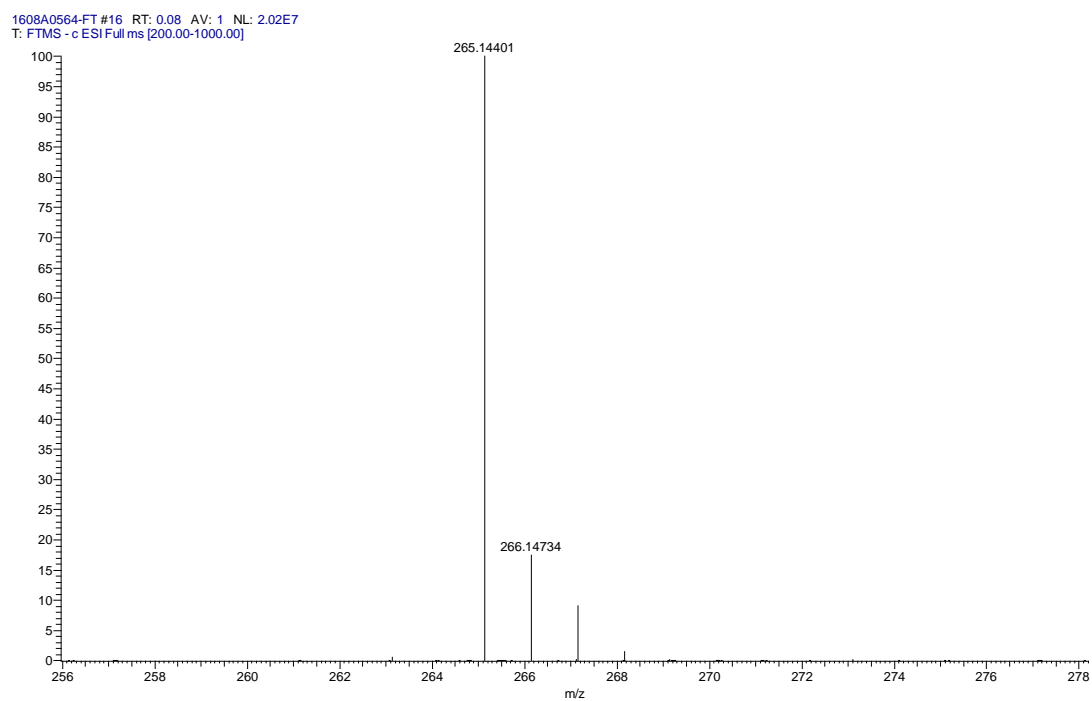

**Figure. S21** HRESIMS spectrum of compound 3.

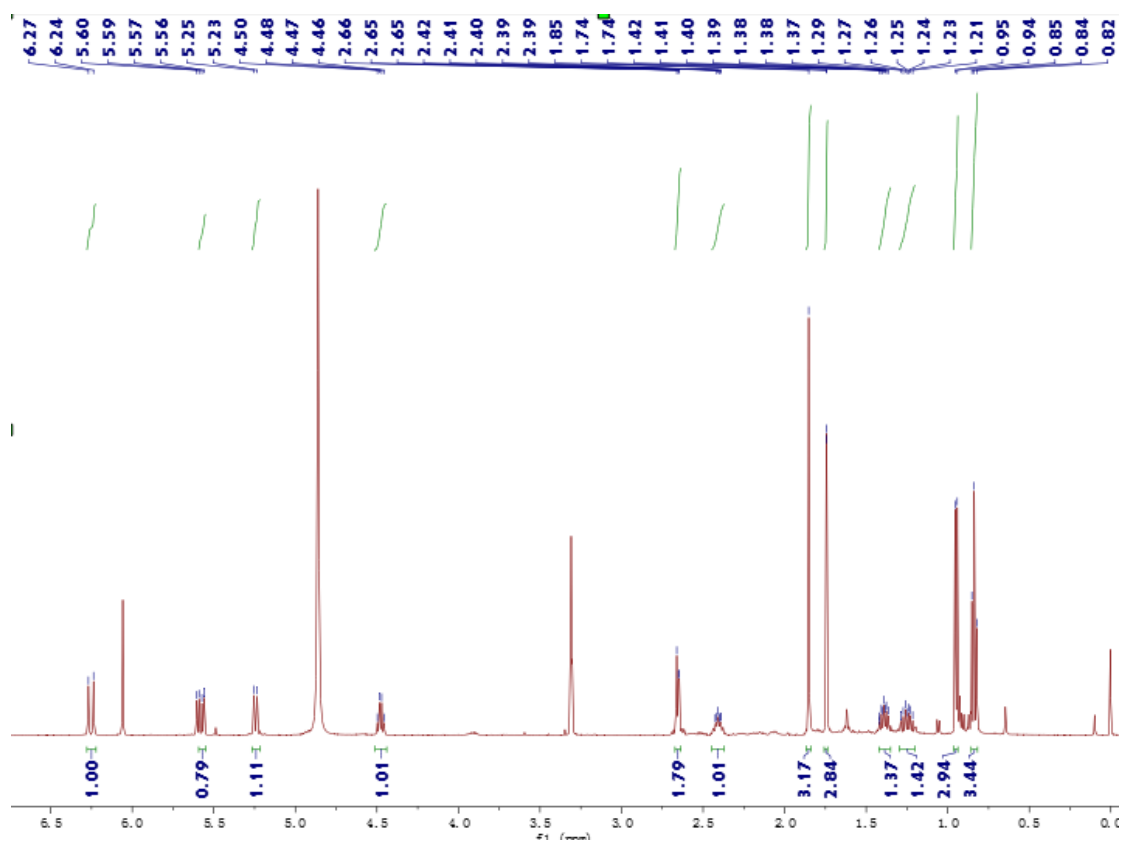

Figure. S22 <sup>1</sup>H NMR spectrum of compound **4** (500 MHz, MeOH-*d*<sub>4</sub>).

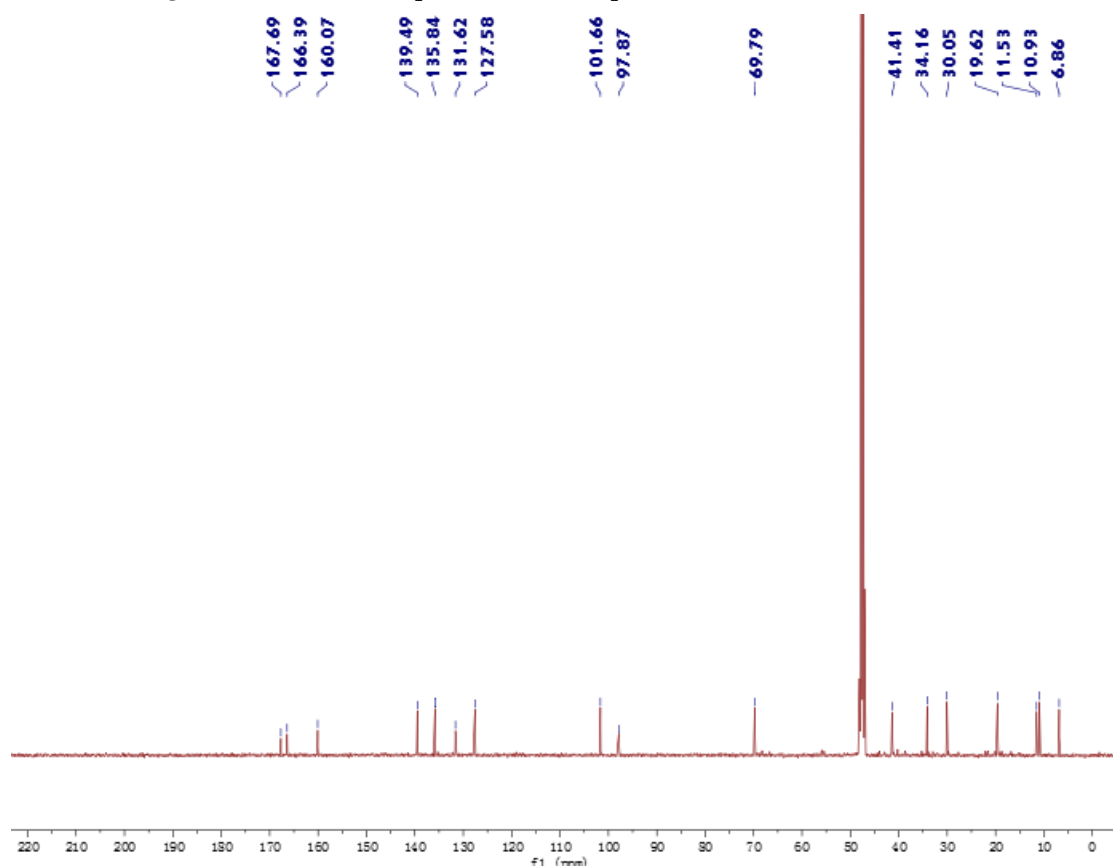

Figure. S23 <sup>13</sup>C NMR spectrum of compound **4** (125 MHz, MeOH-*d*<sub>4</sub>)

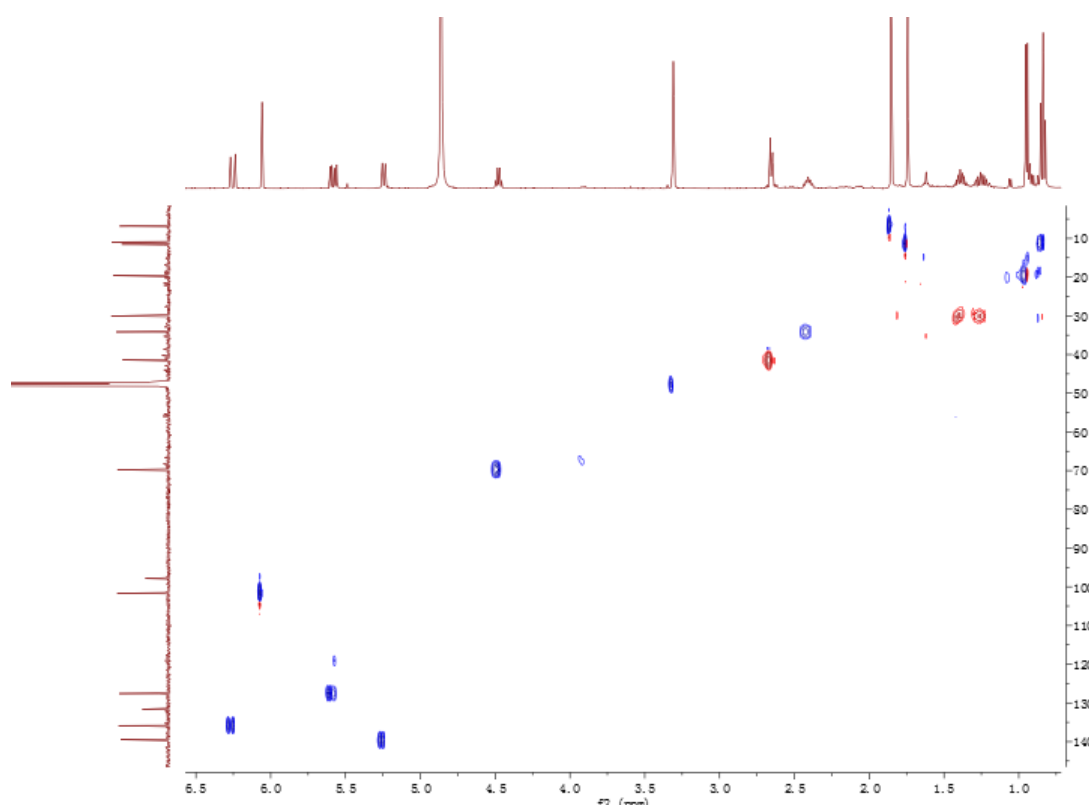

**Figure. S24** HSQC spectrum of compound **4**

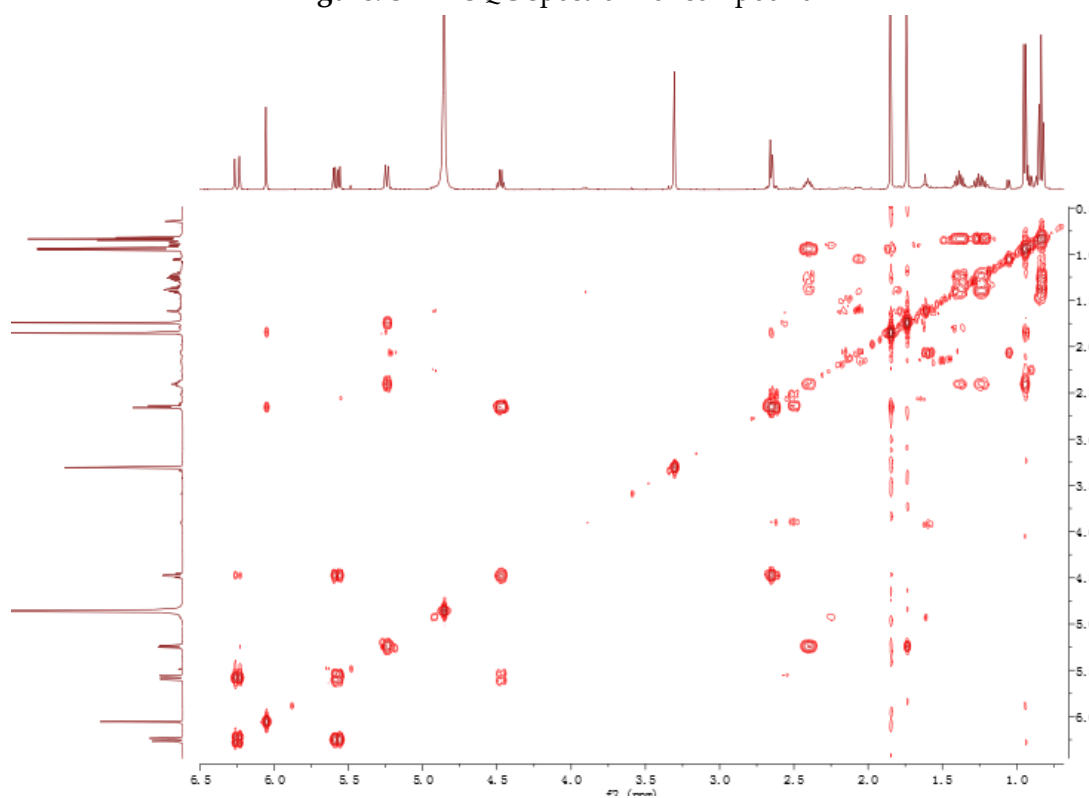

**Figure. S25**  $^1\text{H}$ - $^1\text{H}$  COSY spectrum of compound **4**.



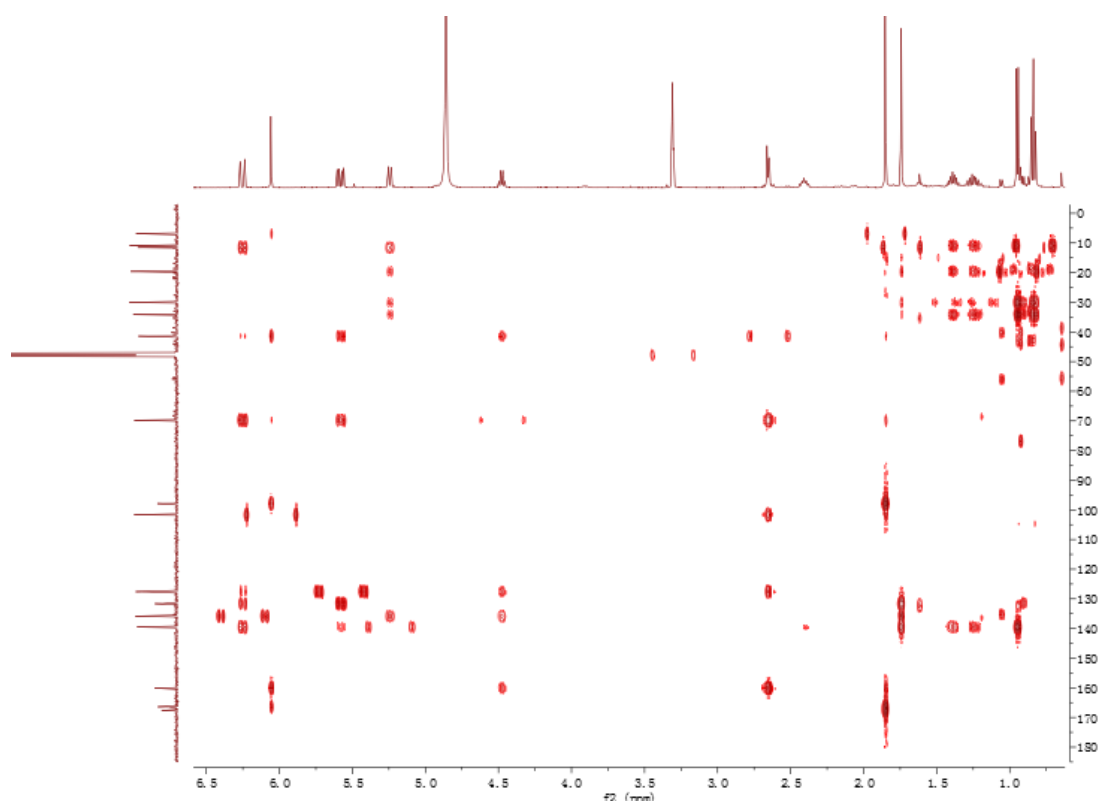

**Figure. S26** HMBC spectrum of compound **4**.

1904A0753-3 #2-9 RT: 0.02-0.08 AV: 4 SB: 1 0.69 NL: 1.79E6  
F: FTMS - c ESI Full ms [100.0000-1000.0000]

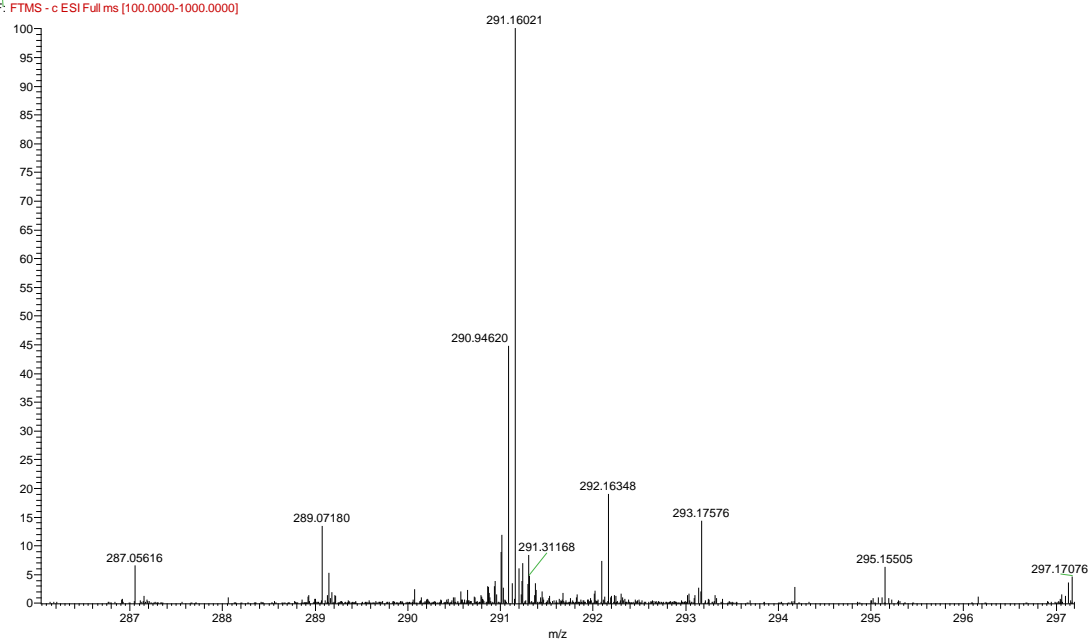

**Figure. S27** HRESIMS spectrum of compound **4**.

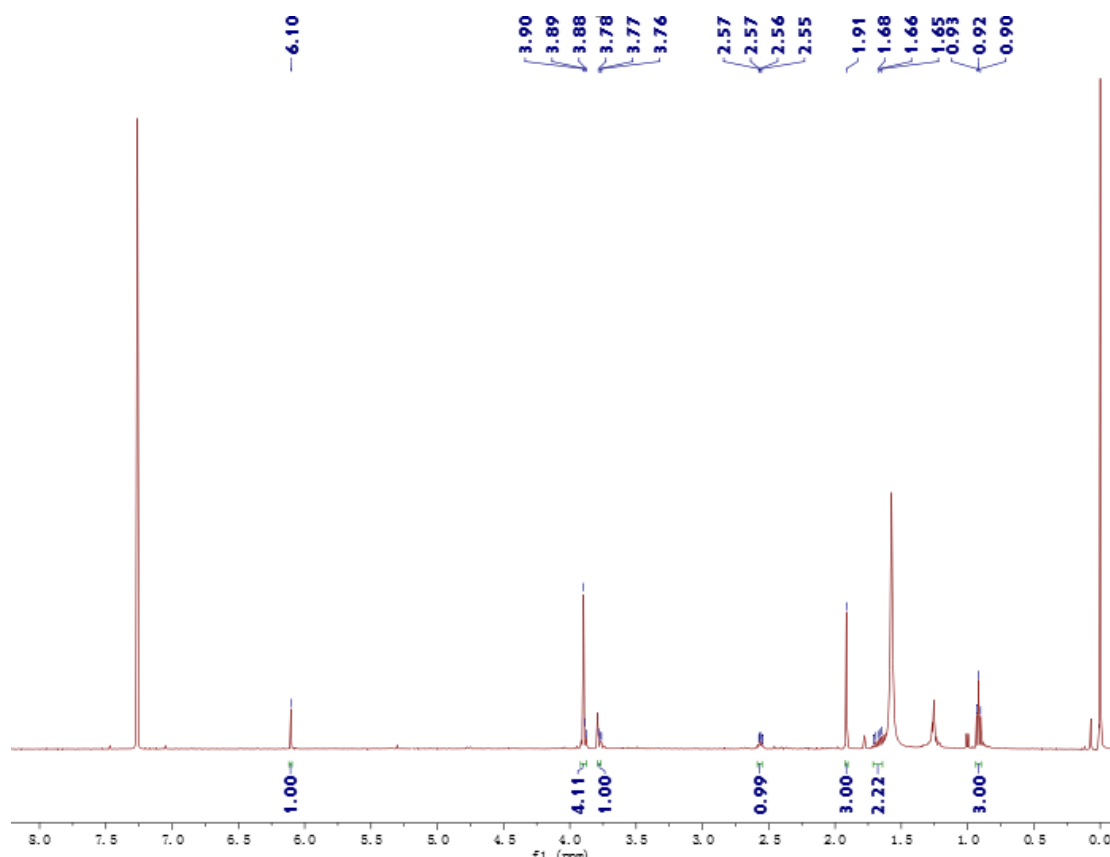

Figure. S28 <sup>1</sup>H NMR spectrum of compound 5 (500 MHz, CDCl<sub>3</sub>)

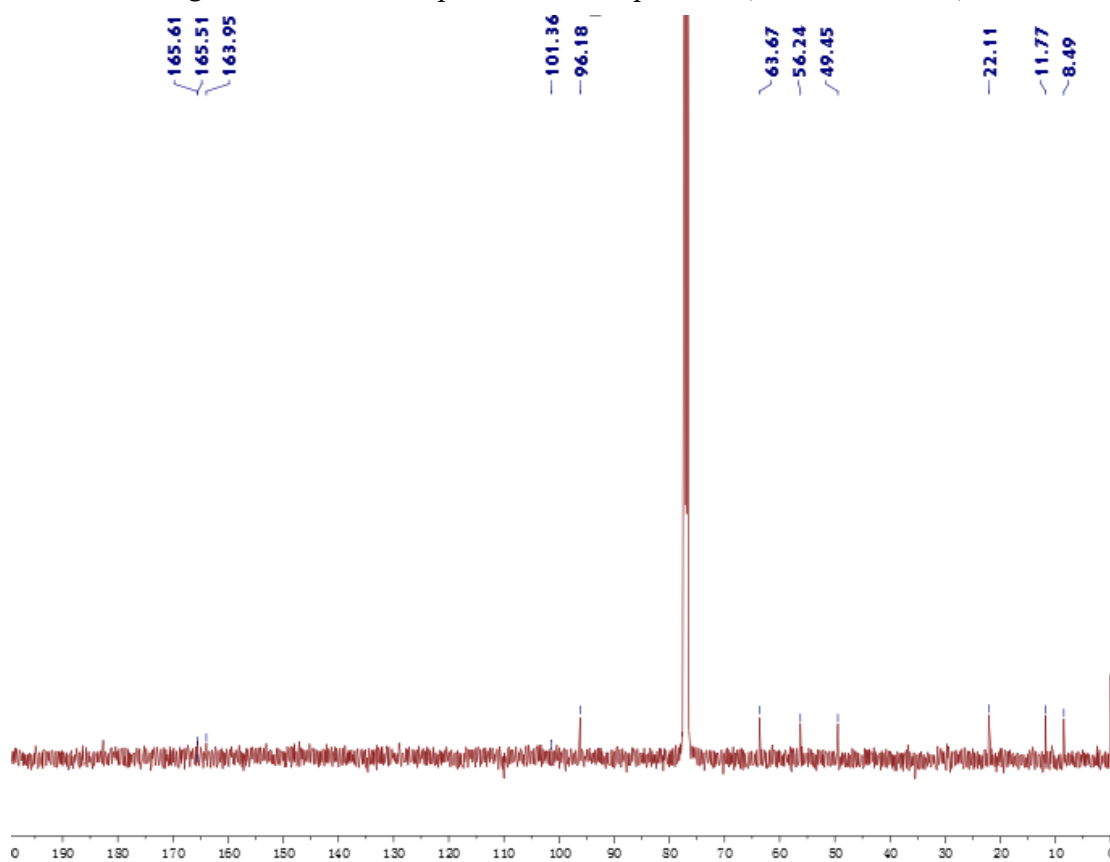

Figure. S29 <sup>13</sup>C NMR spectrum of compound 5 (125 MHz, CDCl<sub>3</sub>)

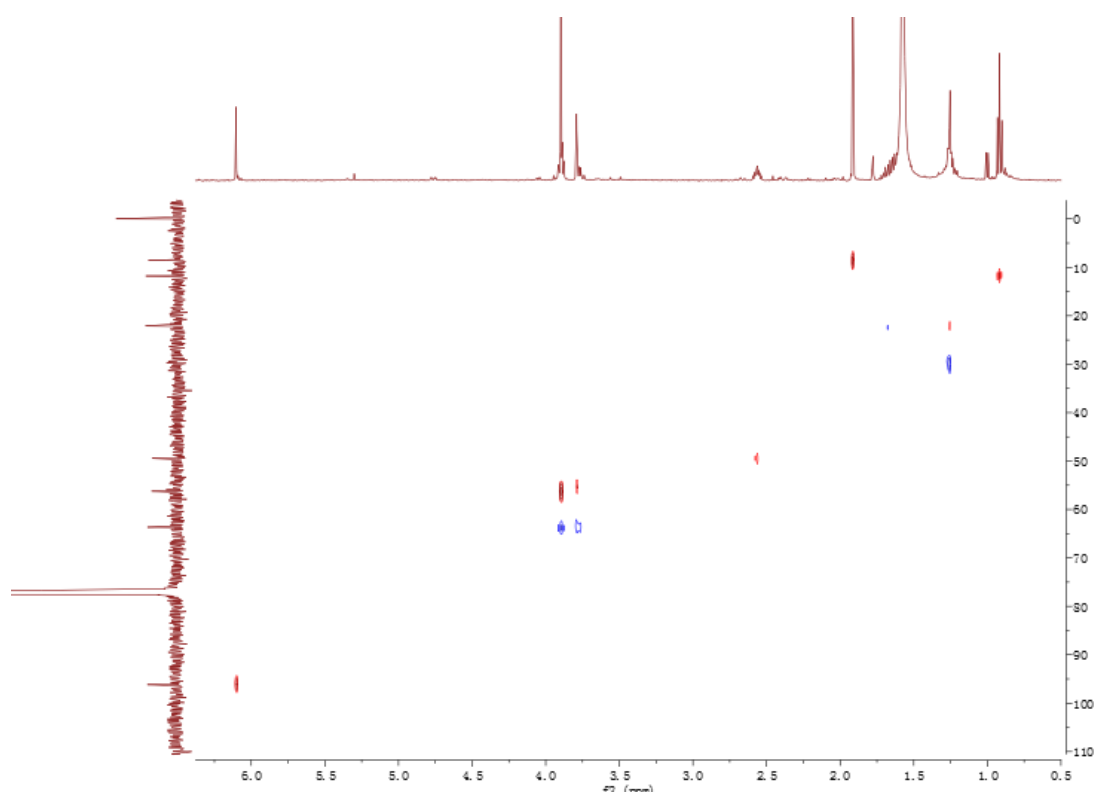

**Figure. S30** HSQC spectrum of compound 5

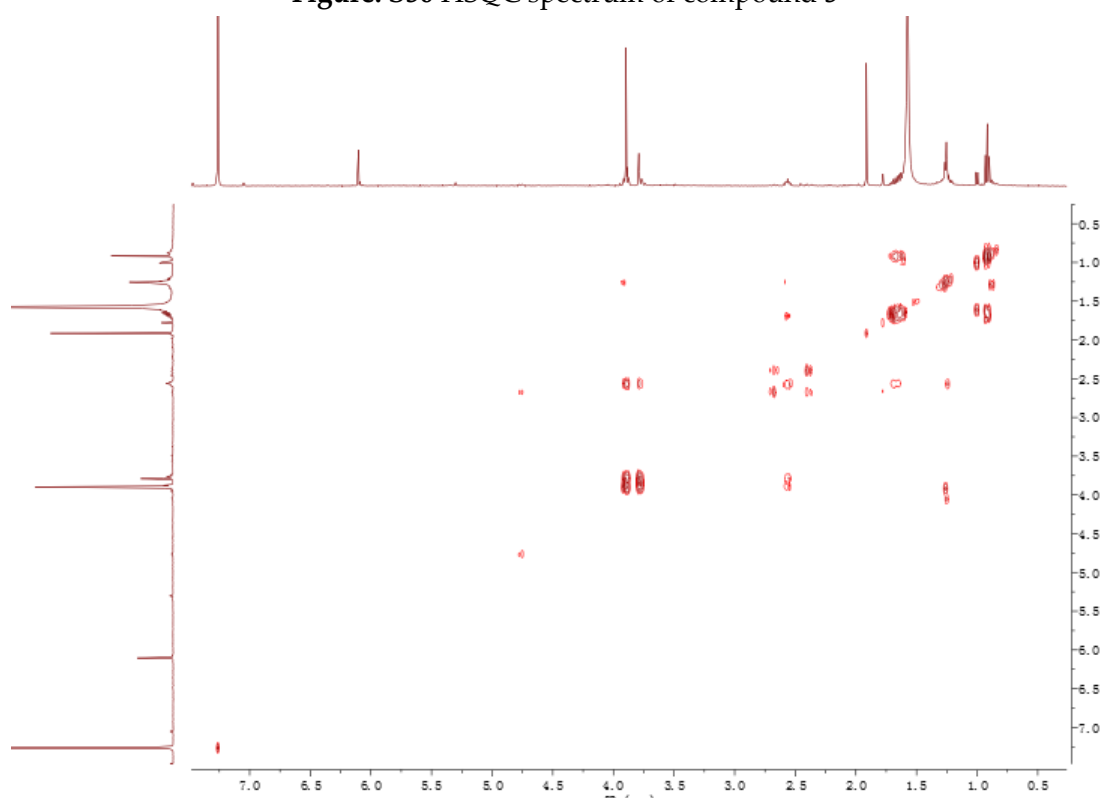

**Figure. S31**  $^1\text{H}$ - $^1\text{H}$  COSY spectrum of compound 5

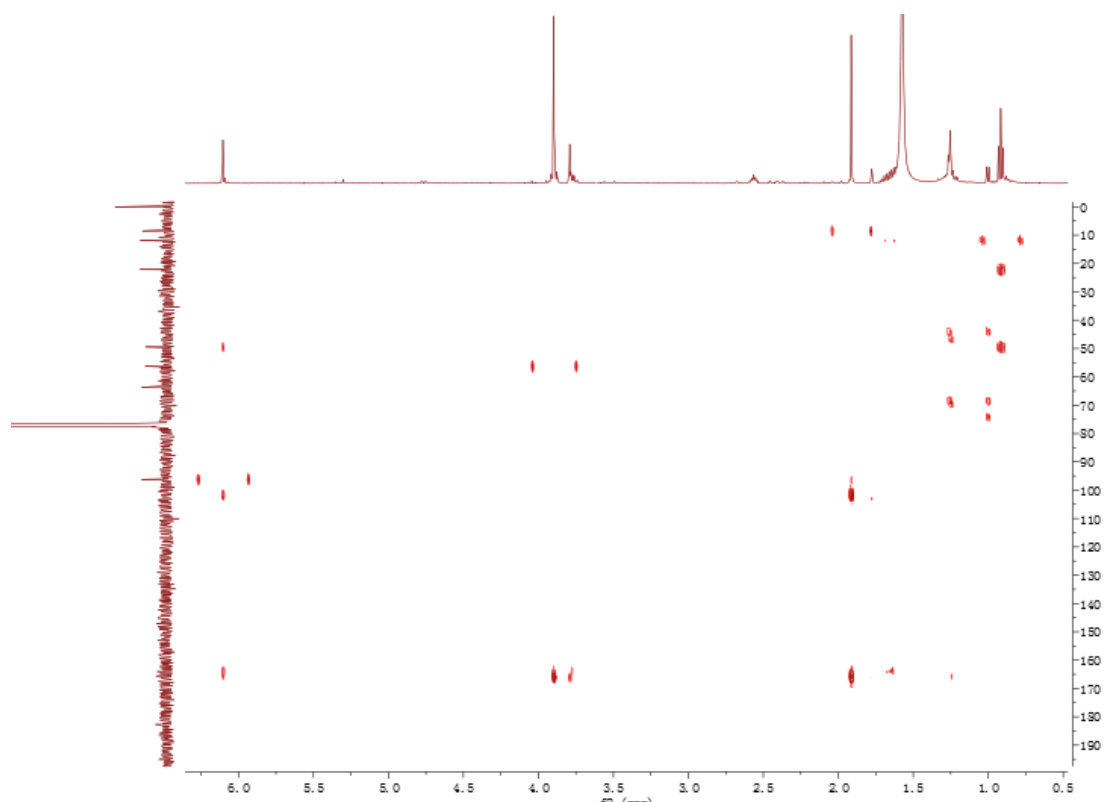

**Figure. S32** HMBC spectrum of compound **5**

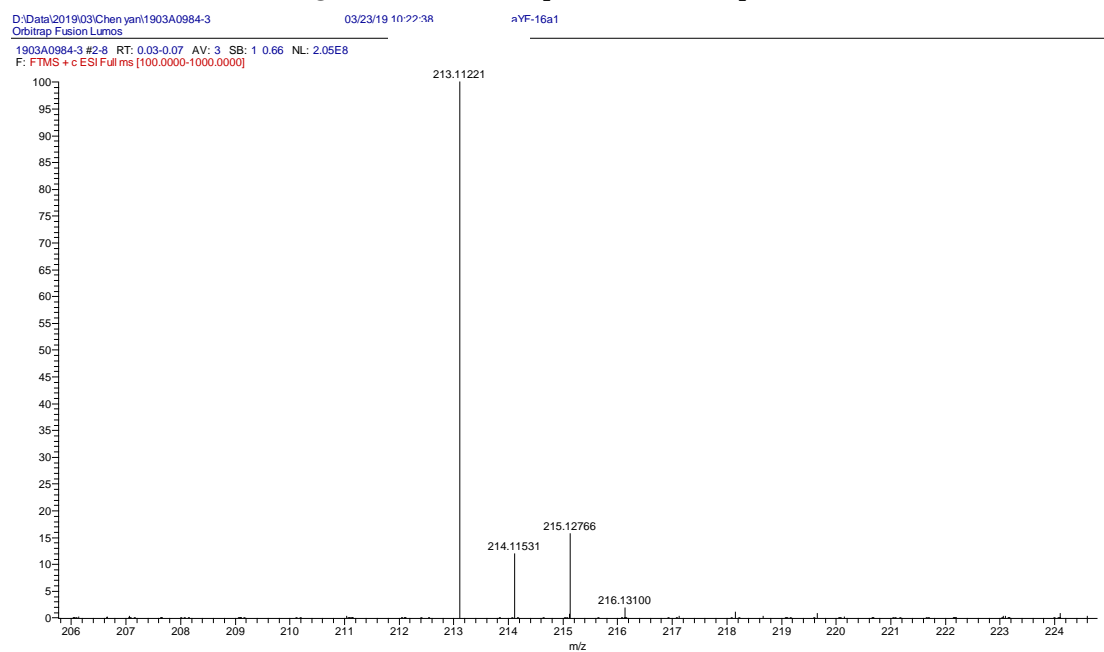

**Figure. S33** HRESIMS spectrum of compound **5**

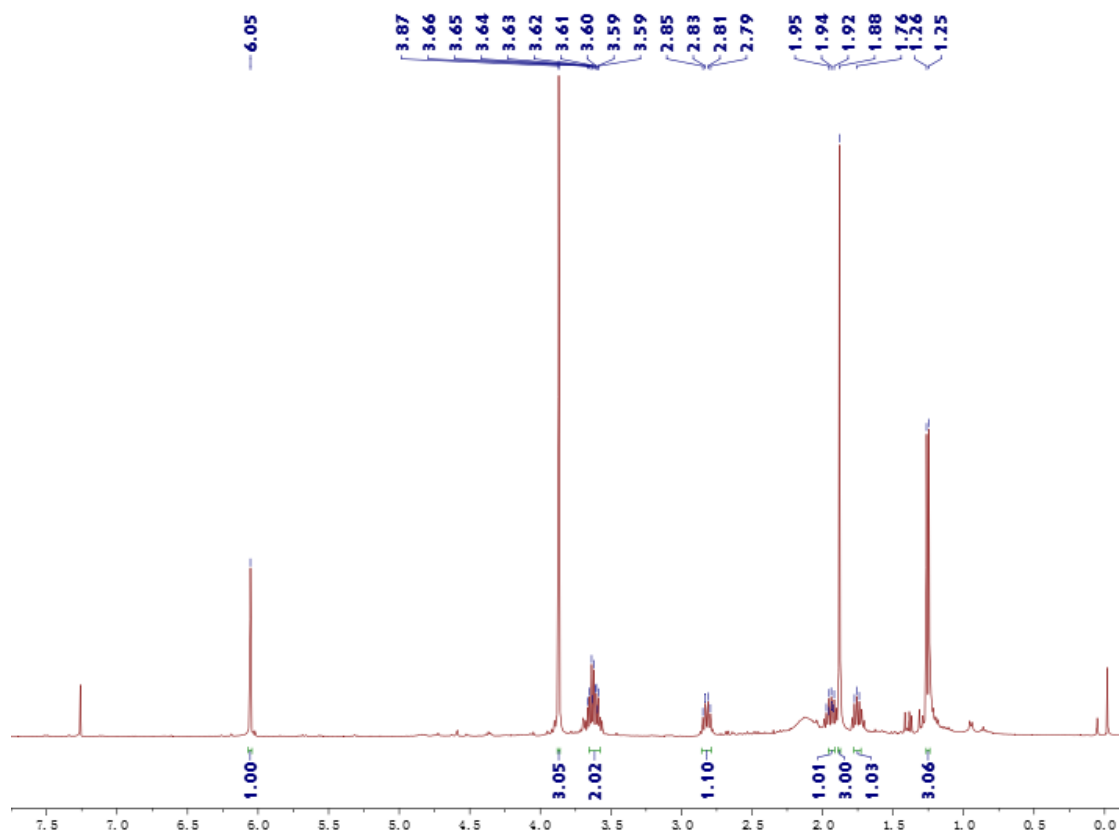

Figure. S34 <sup>1</sup>H NMR spectrum of compound 6 (500 MHz, CDCl<sub>3</sub>)

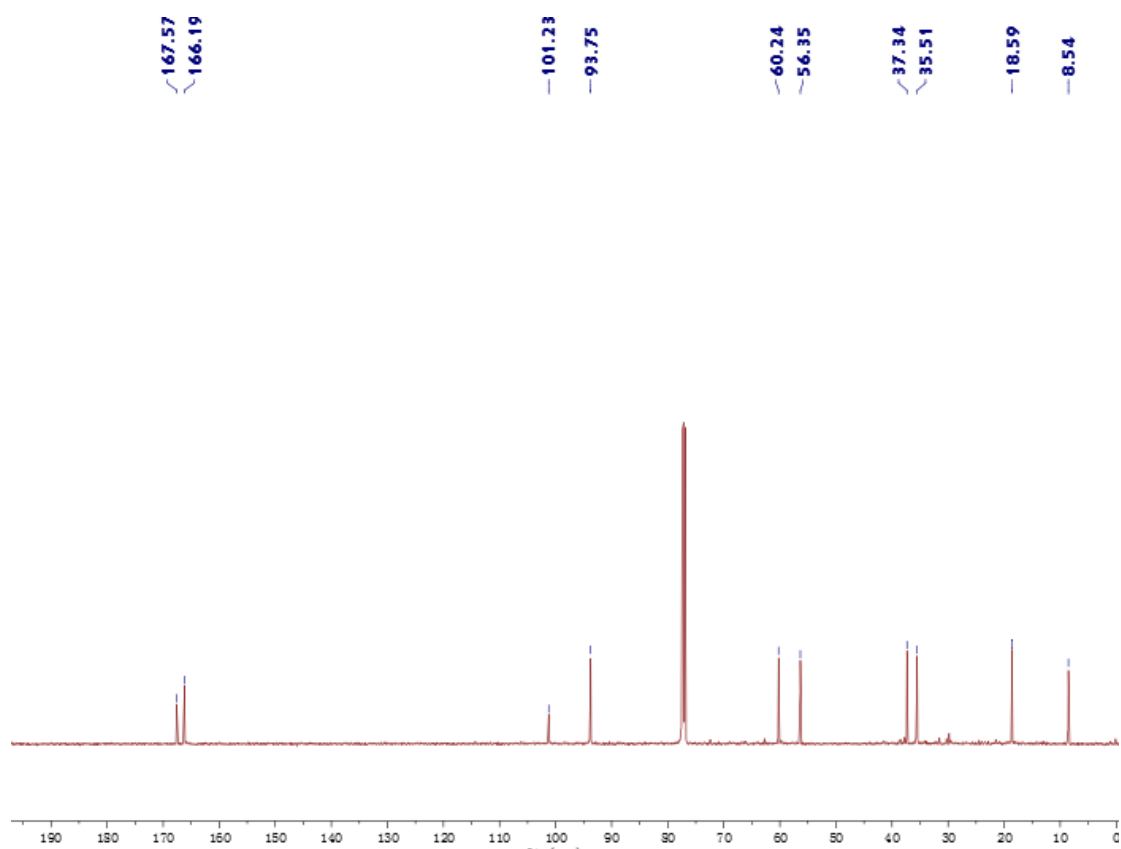

Figure. S35 <sup>13</sup>C NMR spectrum of compound 6 (125 MHz, CDCl<sub>3</sub>)

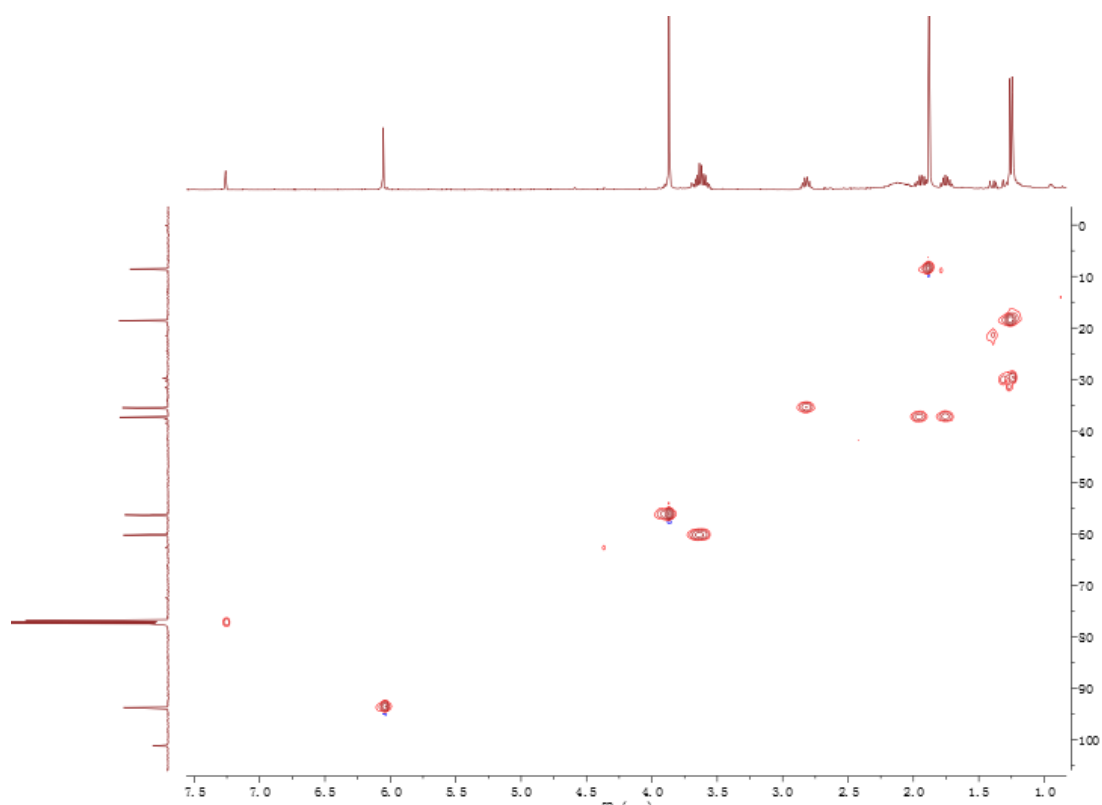

Figure. S36 HSQC spectrum of compound 6

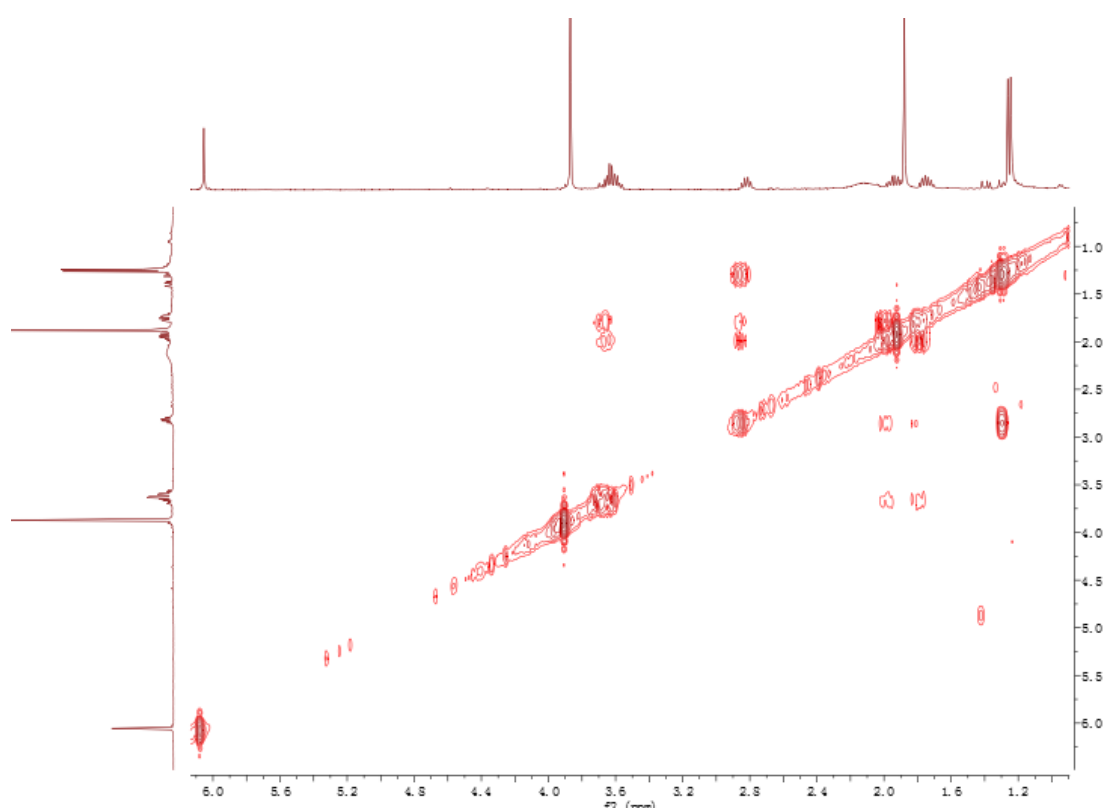

Figure. S37  $^1\text{H}$ - $^1\text{H}$  COSY spectrum of compound 6

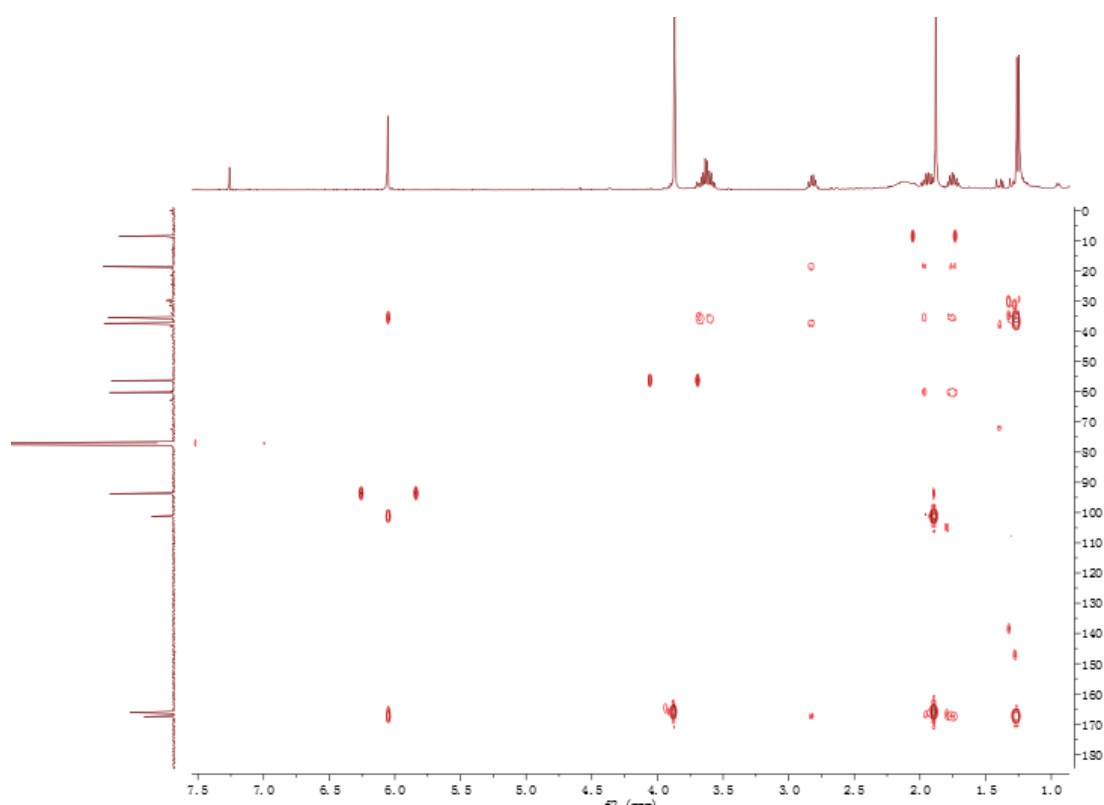

**Figure. S38** HMBC spectrum of compound **6**

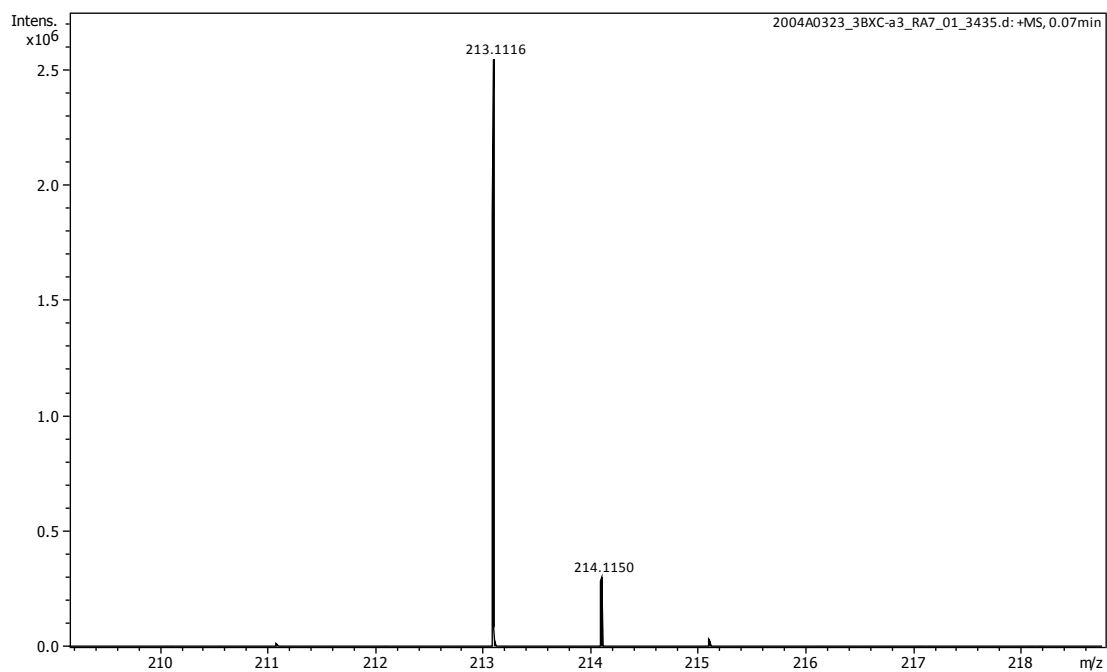

**Figure. S39** HRESIMS spectrum of compound **6**

# **1. The method of anti-inflammatory assay.**

Murine macrophage RAW 264.7 cells purchased from Shanghai Institutes for Biological Sciences in DMEM (high glucose) medium supplemented with

10% (v/v) fetal bovine serum, 100  $\mu\text{g mL}^{-1}$  penicillin and streptomycin, and 10 mM HEPES at 37 °C in a 5% CO<sub>2</sub> atmosphere. Cells ( $1.5 \times 10^5$  cells/mL) with LPS (1  $\mu\text{g/mL}$ ) and samples (100, 50, 25, 12.5 and 6.25  $\mu\text{M}$ ) at 37 °C for 24 h. Briefly, 50  $\mu\text{L}$  of cell culture medium was mixed with 100  $\mu\text{L}$  of Griess reagent, and was incubated at room temperature for 10 min with horizontal shaking. The absorbance was determined at 540 nm wavelength with a microplate reader. N<sup>G</sup>-monomethyl-L-arginine (L-NMMA) was used as a positive control, and was purchased from Sigma-Aldrich Co. (CAS number: 53308-83-1). Wells with DMSO were used as a negative control (final DMSO concentration was 0.1 %). The IC<sub>50</sub> was defined as the concentration of compound that inhibited 50 % NO production relative to the LPS group and was calculated using SPSS 16.0 software. All assays were performed in triplicate.

Cell viability was measured using the conventional MTT assay. RAW 264.7 cells were seeded in 96-well plates at a density of  $1.5 \times 10^5$  cells/mL. After 12 h, the cells were treated with LPS (1  $\mu\text{g/mL}$ ) and samples, followed by additional incubation for 24 h at 37 °C. MTT stock solution (2 mg/mL) was added to wells for a total reaction volume of 110  $\mu\text{L}$ . After 4 h incubation, the supernatants were aspirated. The formazan crystals in each well were dissolved in 50  $\mu\text{L}$  of DMSO, and the absorbance was measured using a microplate reader (Multiskan GO, Thermo Scientific, Waltham, MA, USA) at the wavelength of 490 nm.

**Table S1.** The cell viability of 1-7.

| Compound           | 1       | 2       | 3       | 4       | 5 | 6 | 7       |
|--------------------|---------|---------|---------|---------|---|---|---------|
| Cell viability (%) | 108.371 | 120.536 | 122.847 | 106.536 | - | - | 112.557 |

- not tested.
